# Supplementary material for: Chemoenzymatic synthesis of mono- and di-fluorinated Thomsen–Friedenreich (T) antigens and their sialylated derivatives
Source: Royal Society of Chemistry journal article supplement (doi:10.1039/c2ob26989a), 2012-11-22

# Supporting Information

for

## Chemoenzymatic synthesis of mono- and di-fluorinated Thomsen-Friedenreich (T) antigens and their sialylated derivatives

Jun Yan,<sup>a</sup> Xi Chen,<sup>b</sup> Fengshan Wang,<sup>\*a,c</sup> and Hongzhi Cao<sup>\*a,d</sup>

<sup>a</sup> National Glycoengineering Research Center, School of Pharmaceutical Science, Shandong University, Jinan 250012, China.

<sup>b</sup> Department of Chemistry, University of California, One Shields Avenue, Davis, California 95616, USA.

<sup>c</sup> Key Laboratory of Chemical Biology (Ministry of Education), Shandong University, Jinan 250012, China

<sup>d</sup> State Key Laboratory of Bio-organic and Natural Products Chemistry, Shanghai Institute of Organic Chemistry, Chinese Academy of Sciences, Shanghai 200032, China

\*To whom correspondence should be addressed: Tel: +86-531-8838-2235; Fax: +86-531-8836-3002; E-mail: hzcaos@sdu.edu.cn; fswang@sdu.edu.cn

### Table of Contents

|                                                                             |         |
|-----------------------------------------------------------------------------|---------|
| <sup>1</sup> H NMR spectrum for compound <b>3</b> .....                     | S2      |
| <sup>1</sup> H and <sup>13</sup> C NMR spectra for compound <b>4</b> .....  | S3–S4   |
| <sup>1</sup> H and <sup>13</sup> C NMR spectra for compound <b>5</b> .....  | S5–S6   |
| <sup>1</sup> H NMR spectrum for compound <b>6</b> .....                     | S7      |
| <sup>1</sup> H NMR spectrum for compound <b>7</b> .....                     | S8      |
| <sup>1</sup> H and <sup>13</sup> C NMR spectra for compound <b>8</b> .....  | S9–S10  |
| <sup>1</sup> H and <sup>13</sup> C NMR spectra for compound <b>9</b> .....  | S11–S12 |
| <sup>1</sup> H and <sup>13</sup> C NMR spectra for compound <b>10</b> ..... | S13–S14 |
| <sup>1</sup> H and <sup>13</sup> C NMR spectra for compound <b>11</b> ..... | S15–S16 |
| <sup>1</sup> H NMR spectrum for compound <b>12</b> .....                    | S17     |
| <sup>1</sup> H NMR spectrum for compound <b>13</b> .....                    | S18     |
| <sup>1</sup> H and <sup>13</sup> C NMR spectra for compound <b>14</b> ..... | S19–S20 |
| <sup>1</sup> H and <sup>13</sup> C NMR spectra for compound <b>15</b> ..... | S21–S22 |
| <sup>1</sup> H and <sup>13</sup> C NMR spectra for compound <b>16</b> ..... | S23–S24 |
| <sup>1</sup> H and <sup>13</sup> C NMR spectra for compound <b>17</b> ..... | S25–S26 |
| <sup>1</sup> H NMR spectrum for compound <b>18</b> .....                    | S27–S28 |
| <sup>1</sup> H and <sup>13</sup> C NMR spectra for compound <b>19</b> ..... | S29–S30 |
| HPLC conditions and chromatograms of ST-antigens ( <b>12–17</b> ).....      | S31–S32 |

### <sup>1</sup>H NMR spectrum for GalNAcαProN<sub>3</sub>, 3

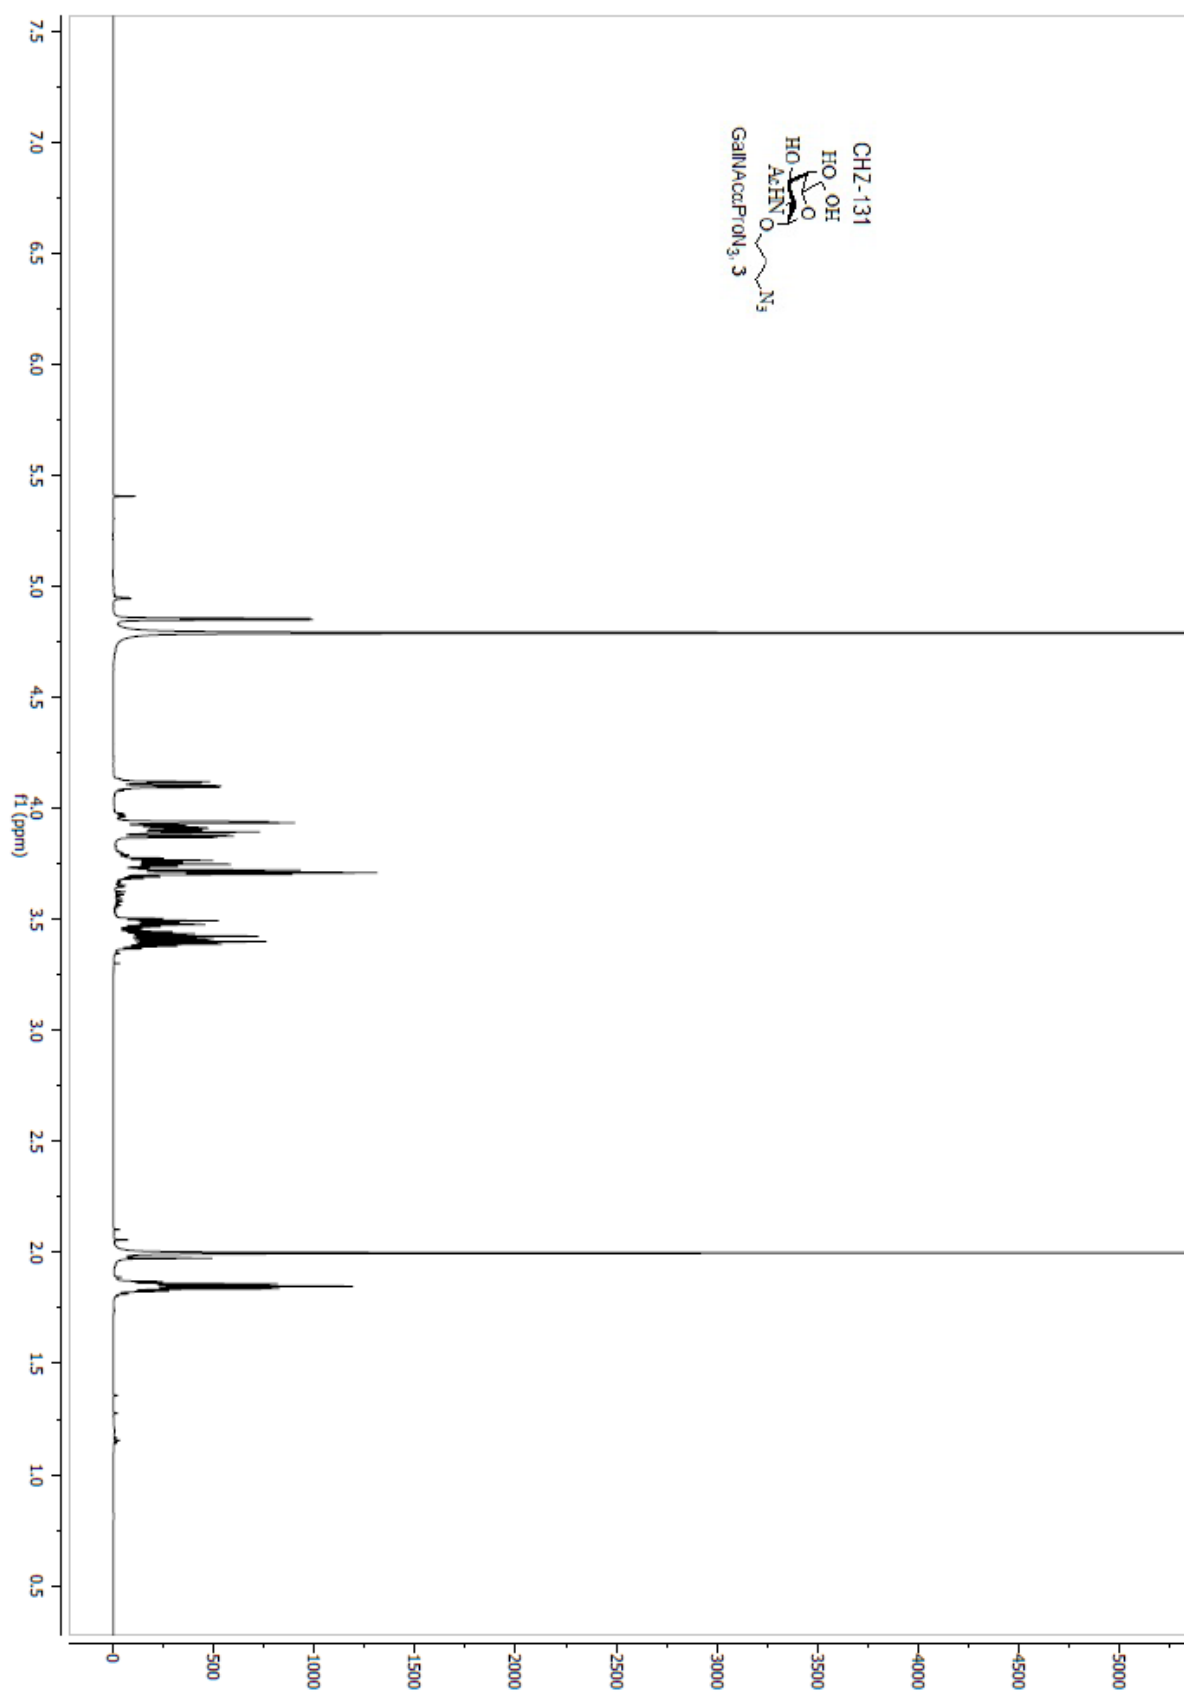

### $^1\text{H}$ NMR spectrum for GalNAc6F $\alpha$ ProN<sub>3</sub>, 4

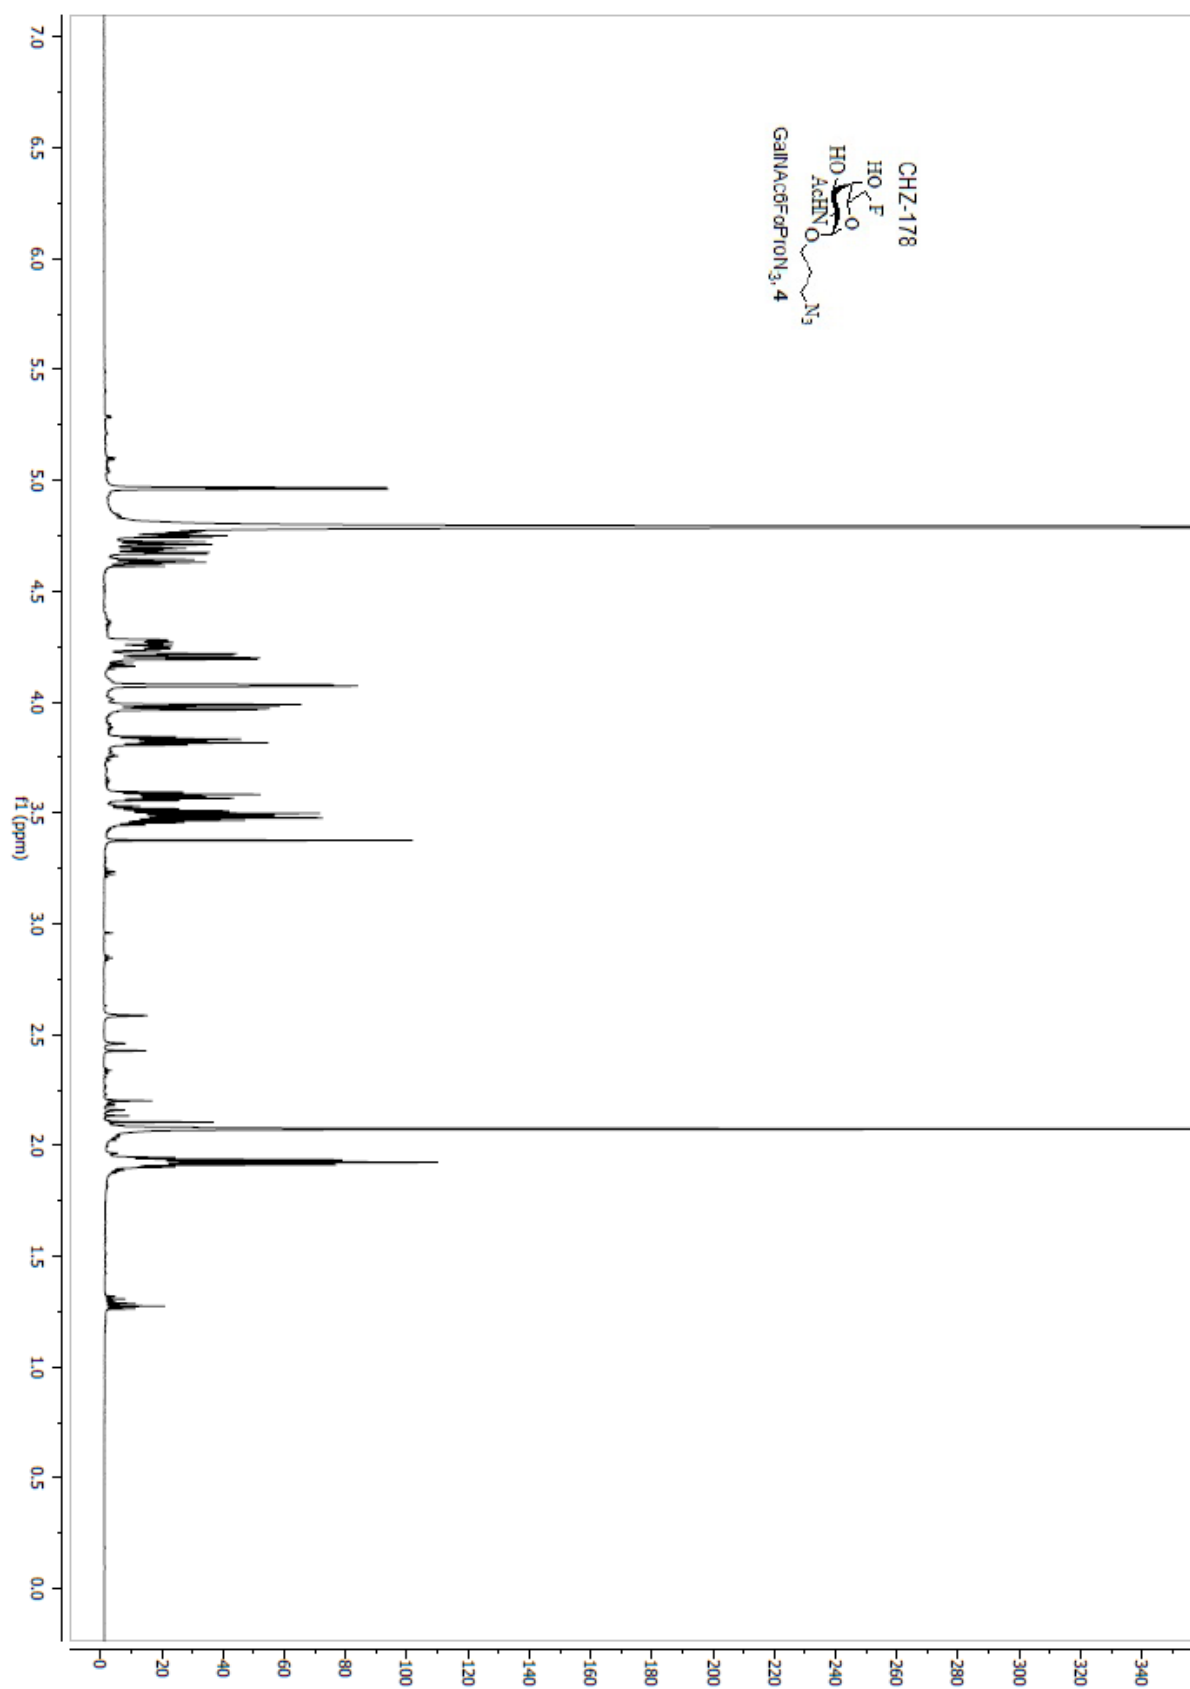

### $^{13}\text{C}$ NMR spectrum for GalNAc6F $\alpha$ ProN<sub>3</sub>, 4

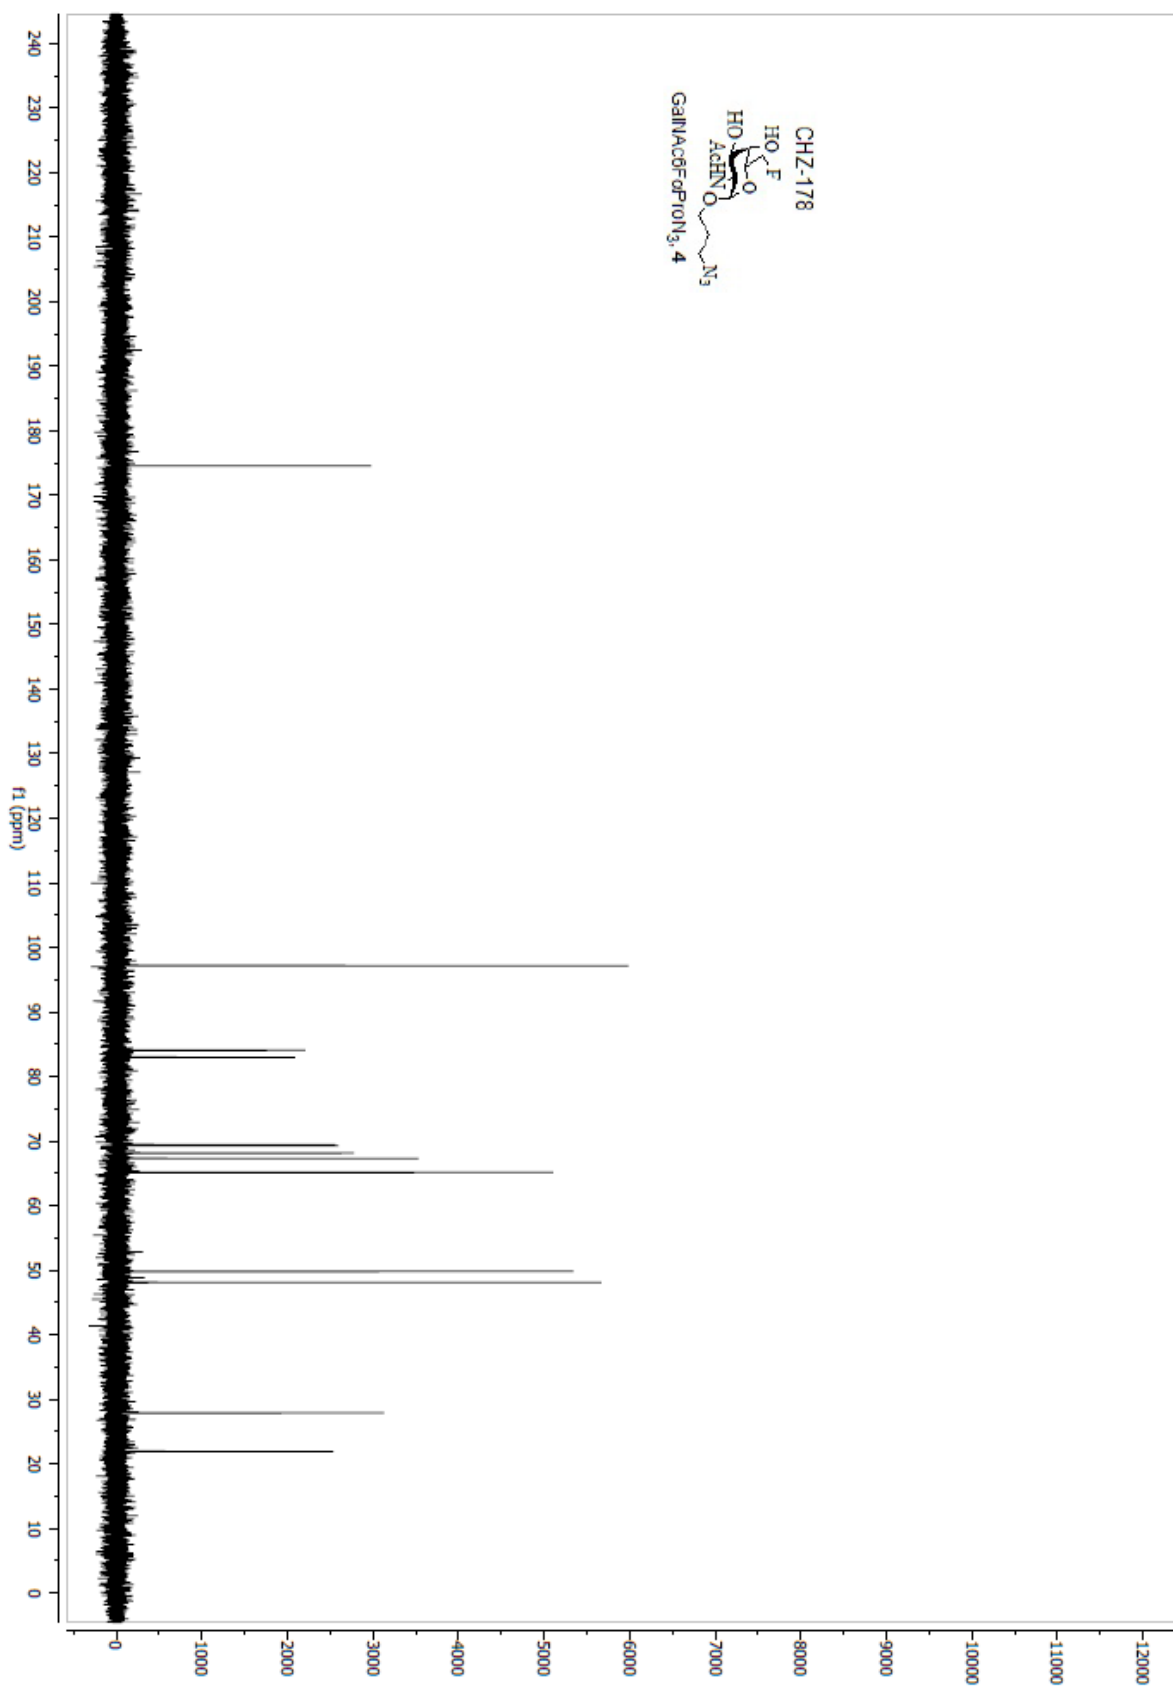

### $^1\text{H}$ NMR spectrum for Gal6F, 5

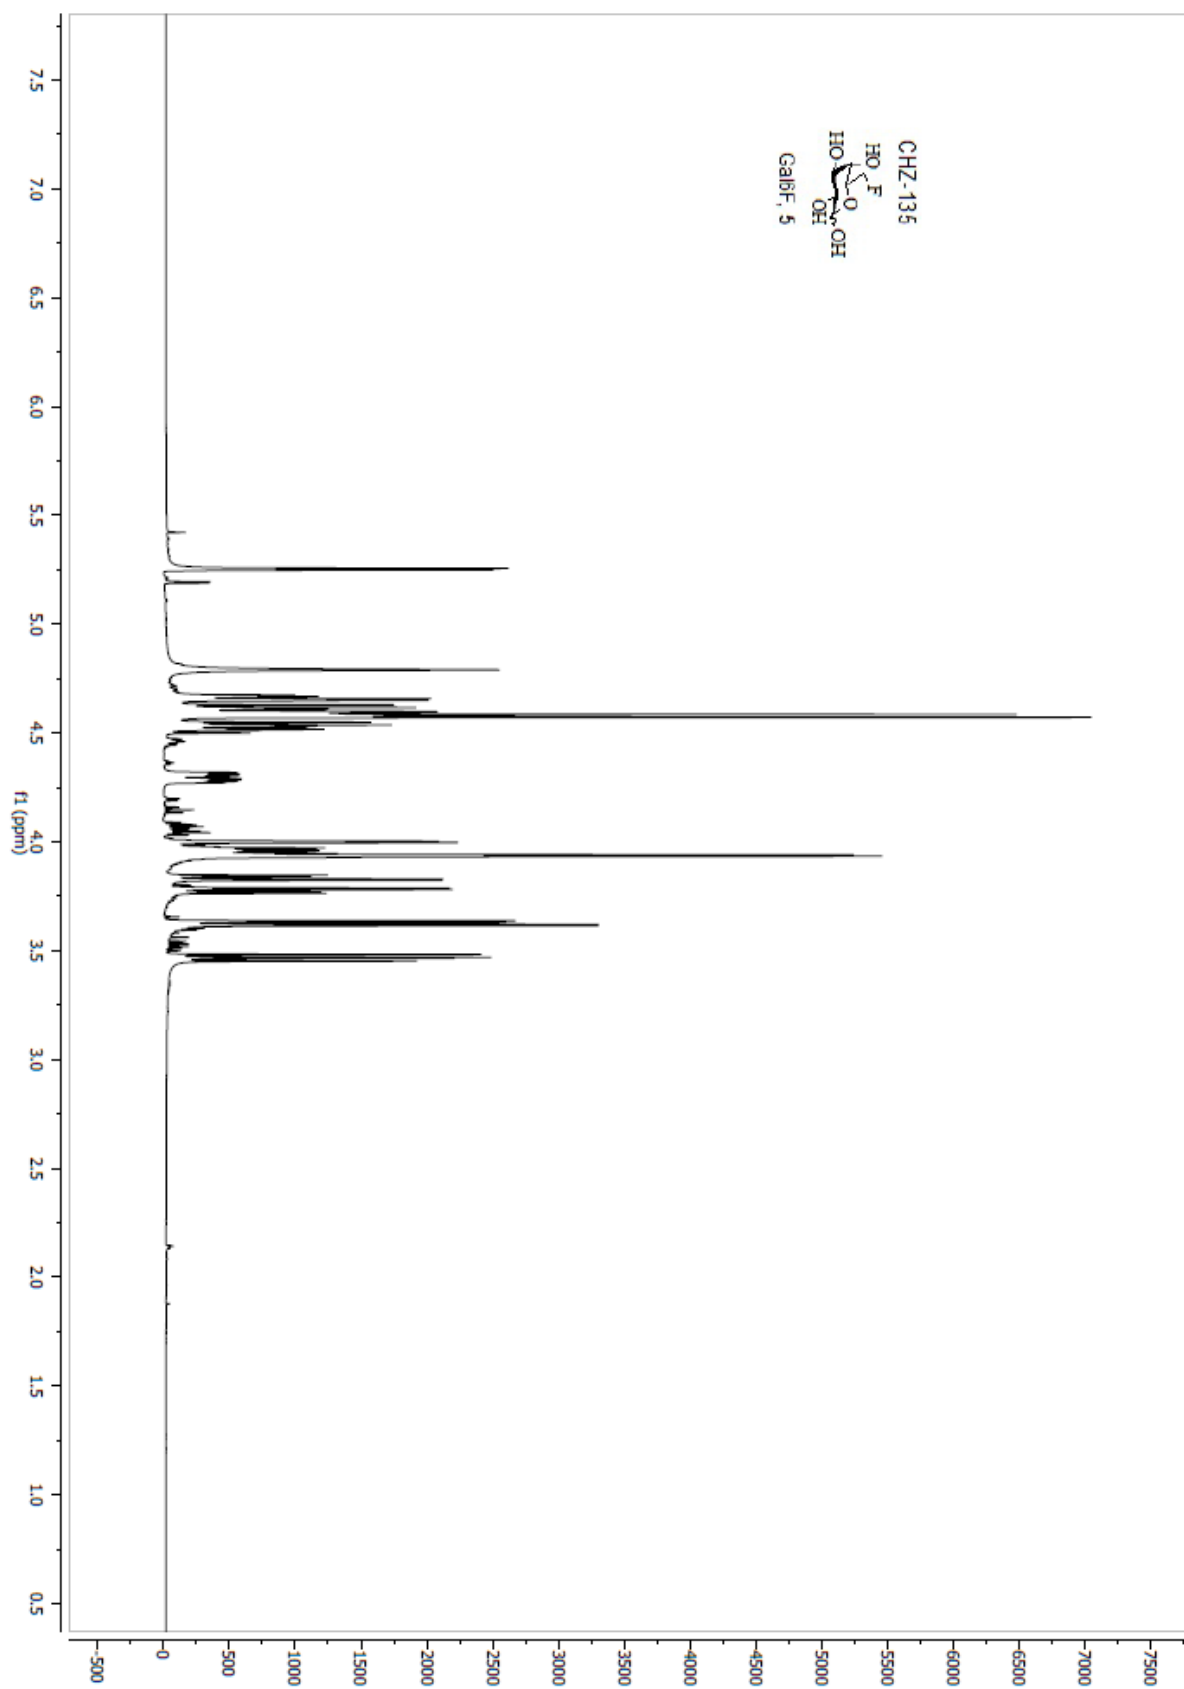

### $^{13}\text{C}$ NMR spectrum for Gal6F, 5

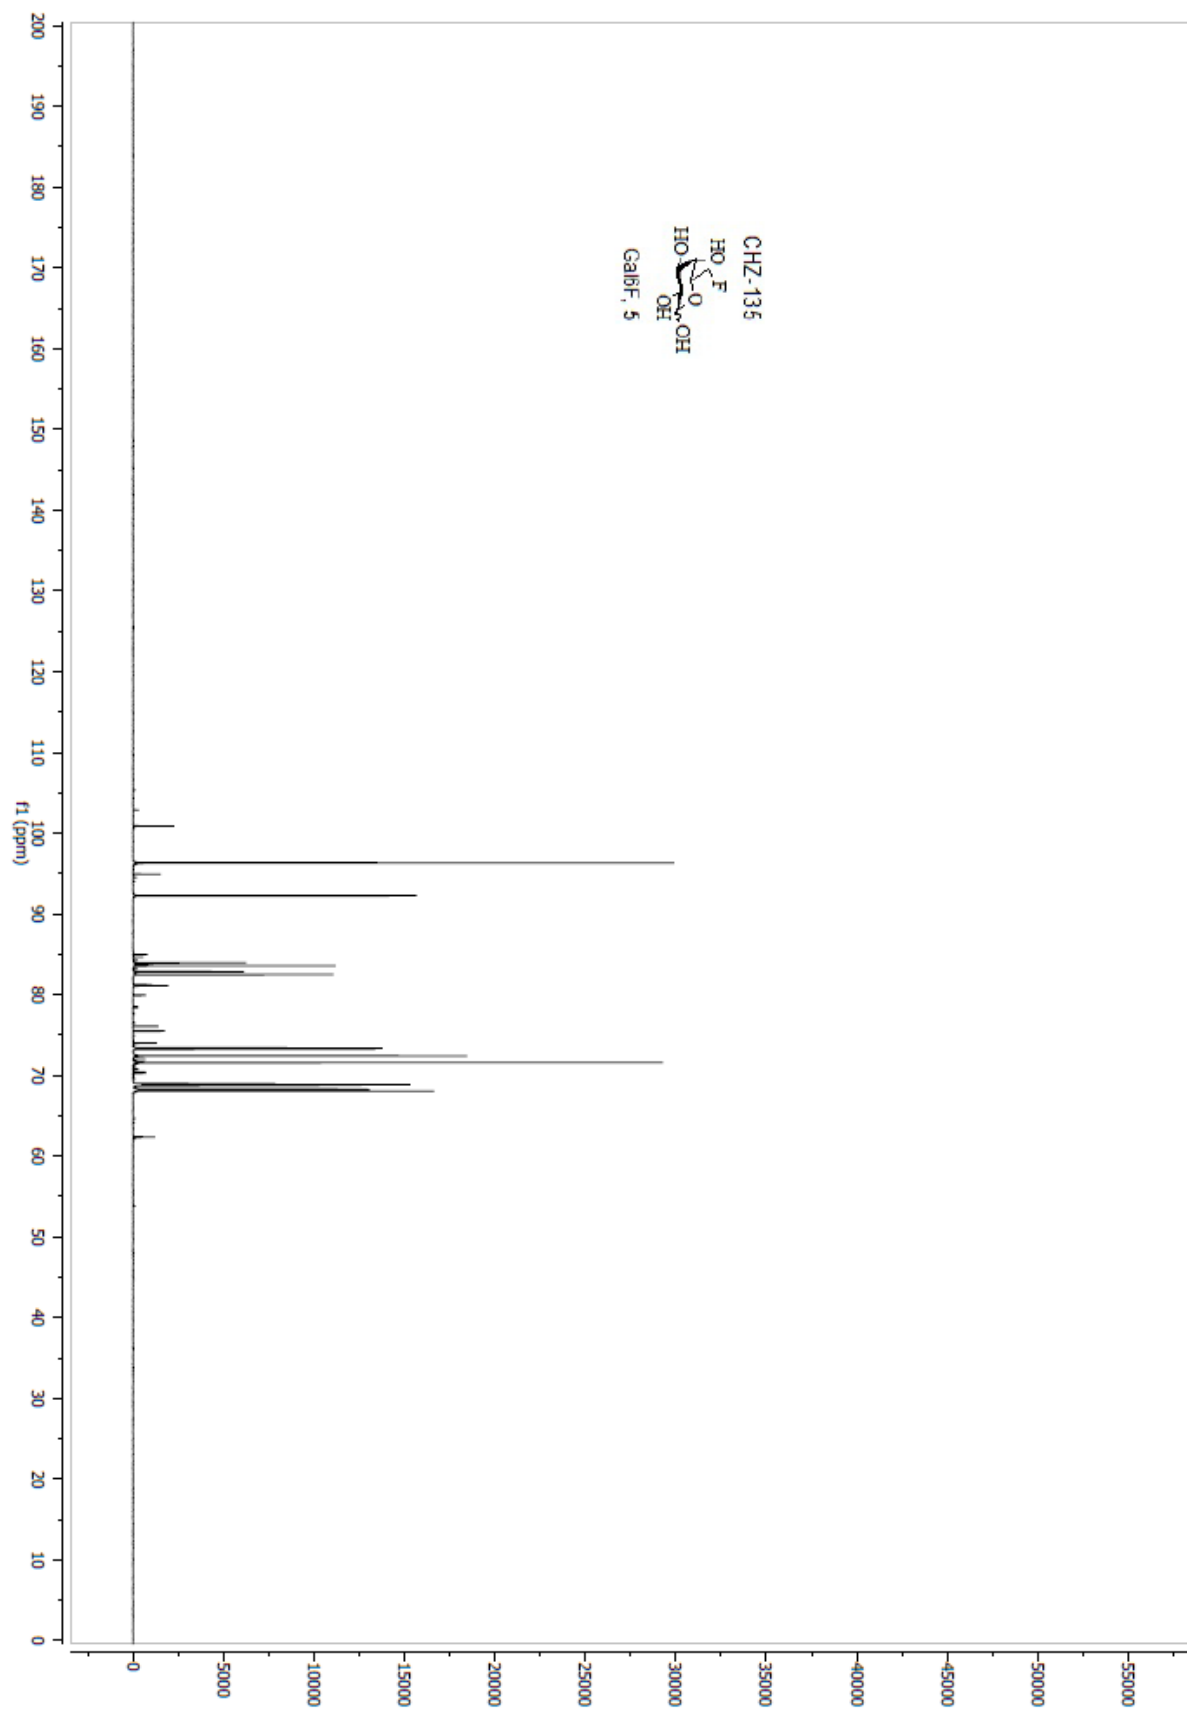

### $^1\text{H}$ NMR spectrum for Gal $\beta$ 1-3GalNAc, **6**

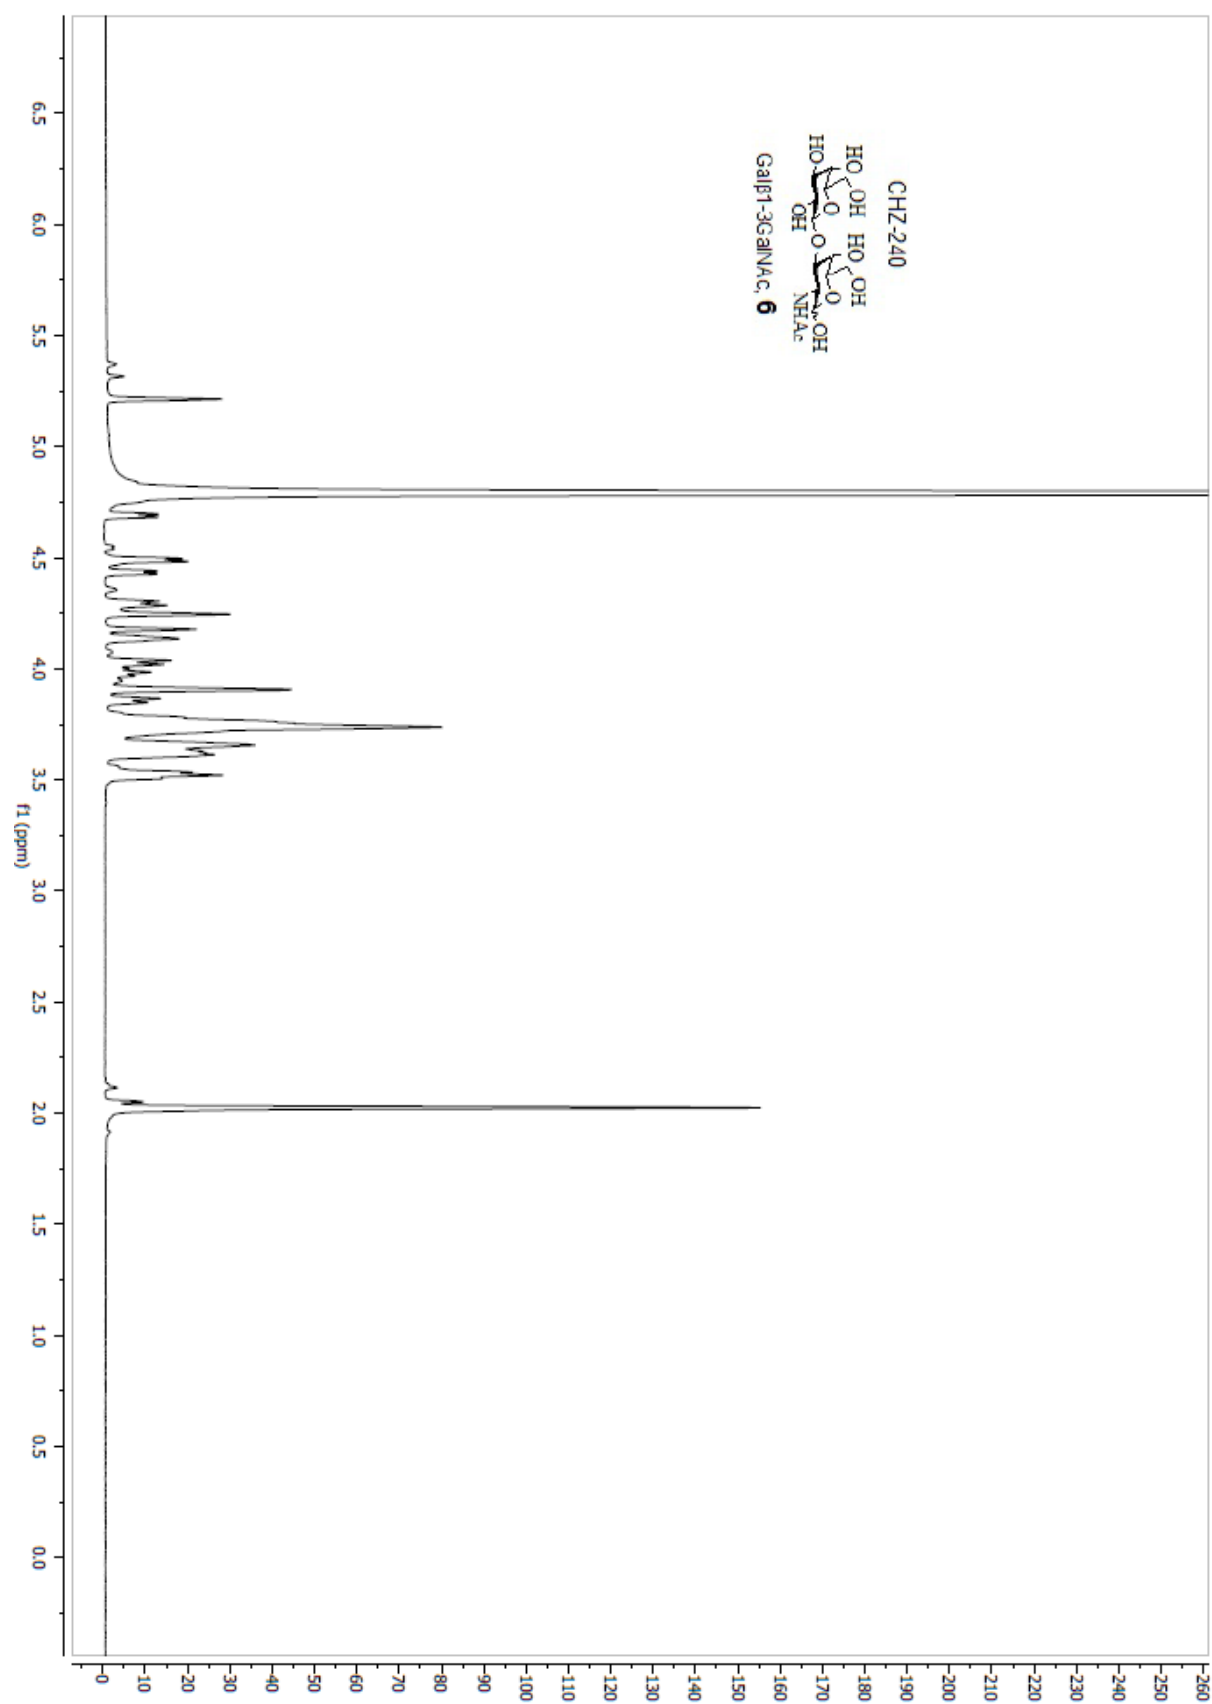

$^1\text{H}$  NMR spectrum for Gal $\beta$ 1-3GalNAc $\alpha$ ProN $_3$ , 7

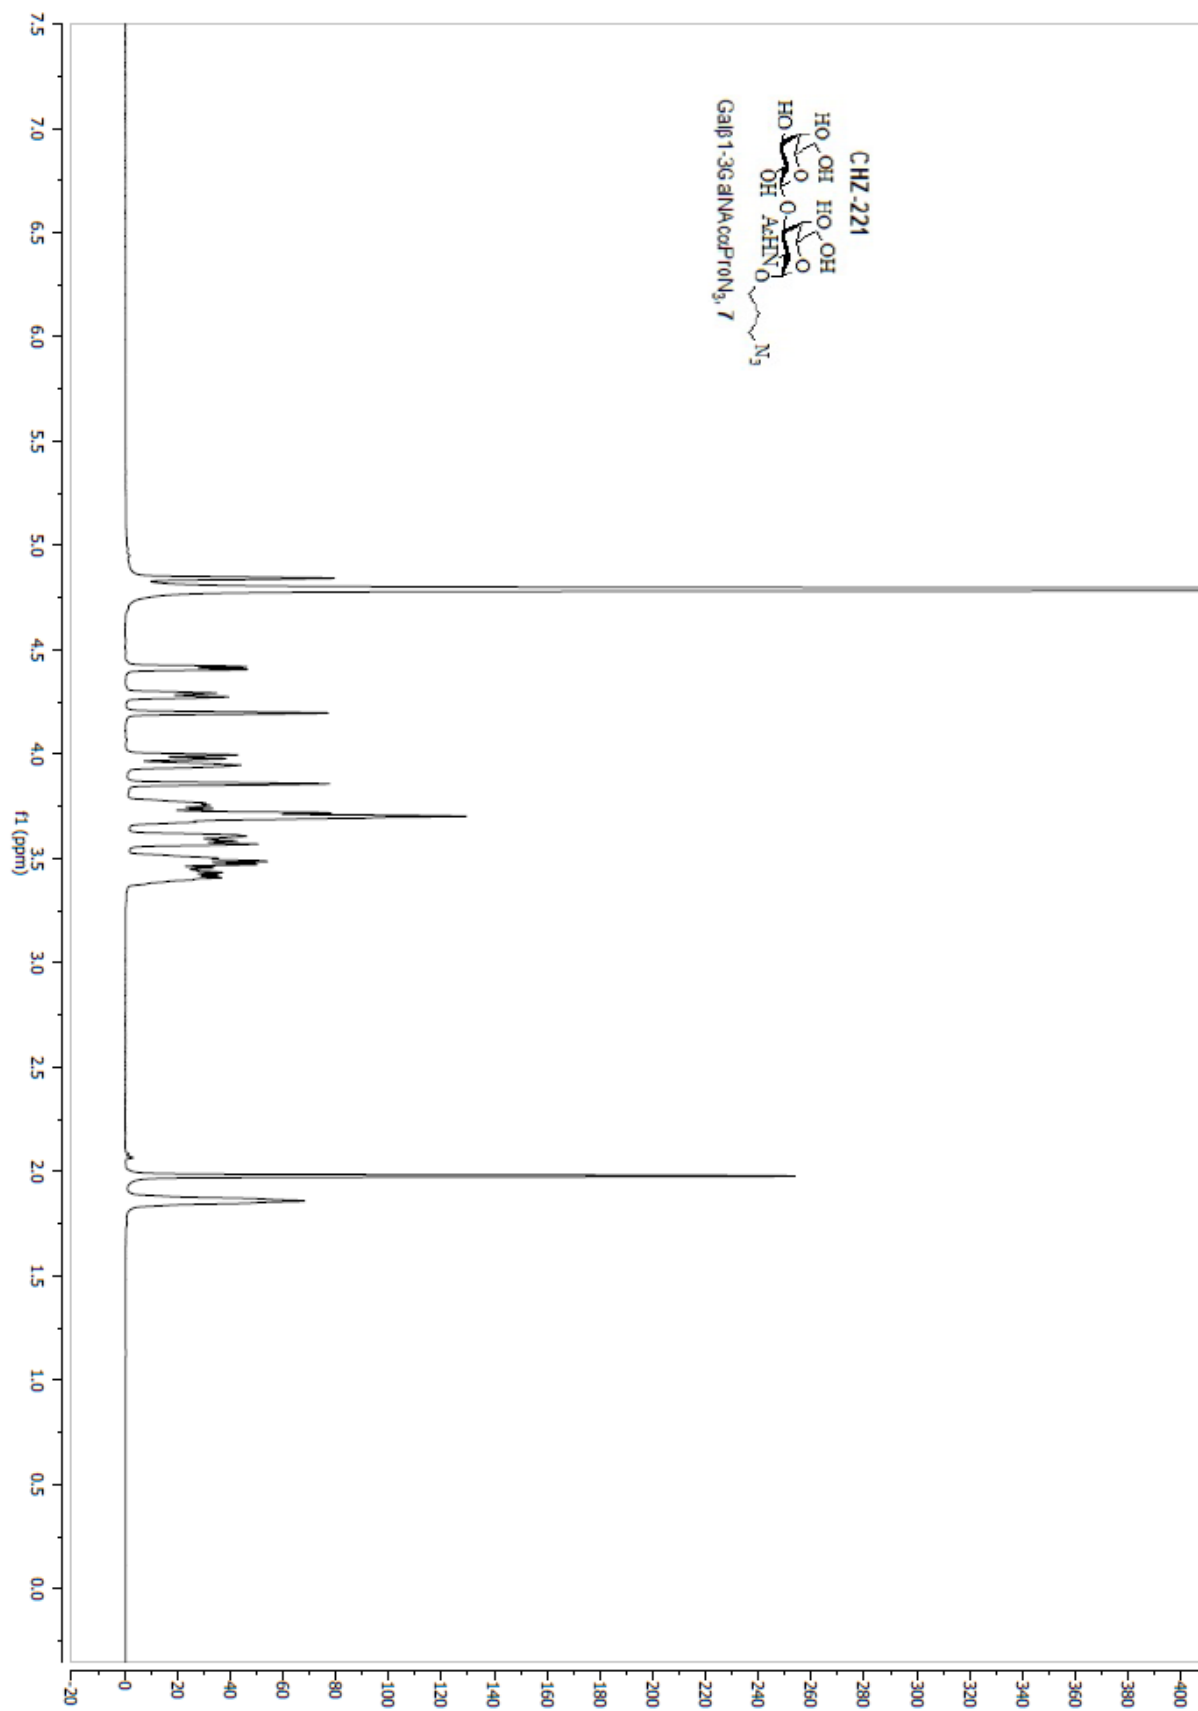



### $^1\text{H}$ NMR spectra for Gal $\beta$ 1-3GalNAc6F $\alpha$ ProN $_3$ , 8

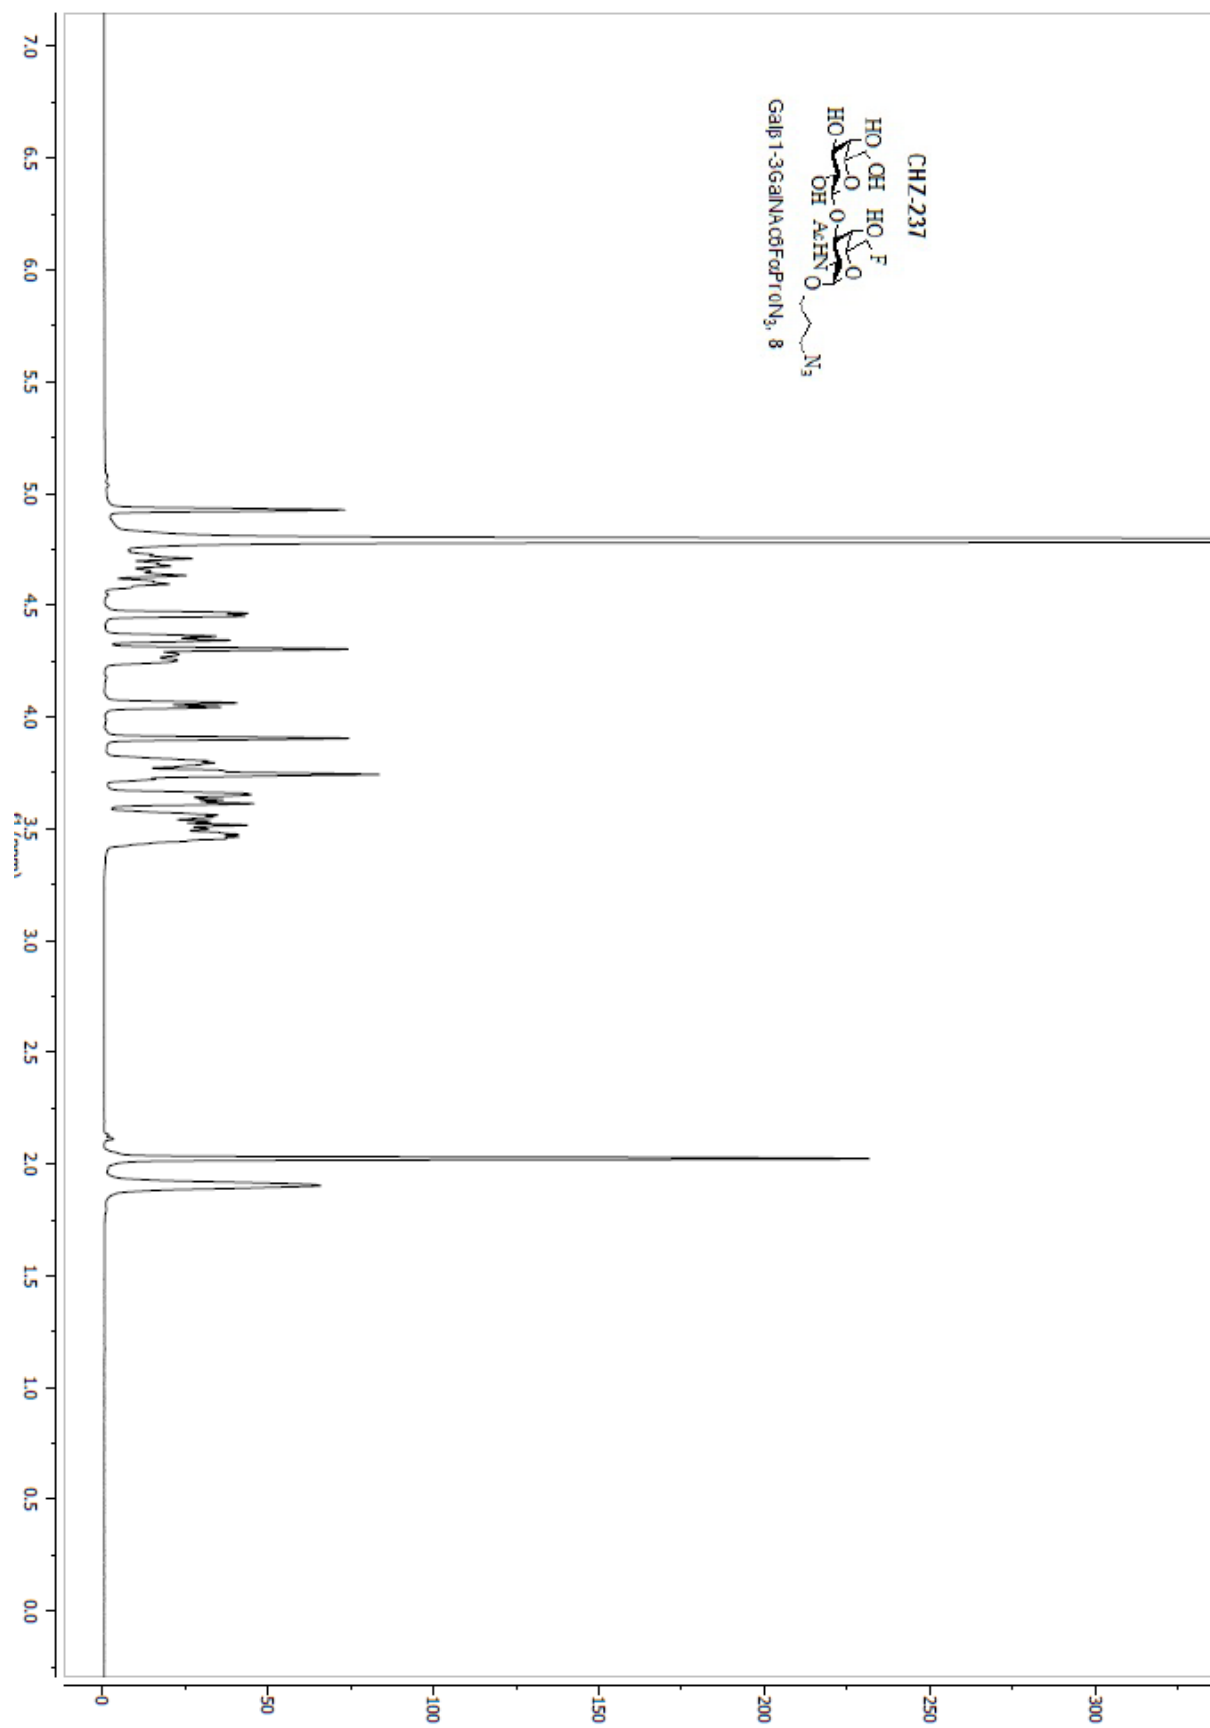

### $^{13}\text{C}$ NMR spectra for Gal $\beta$ 1-3GalNAc6F $\alpha$ ProN $_3$ , 8

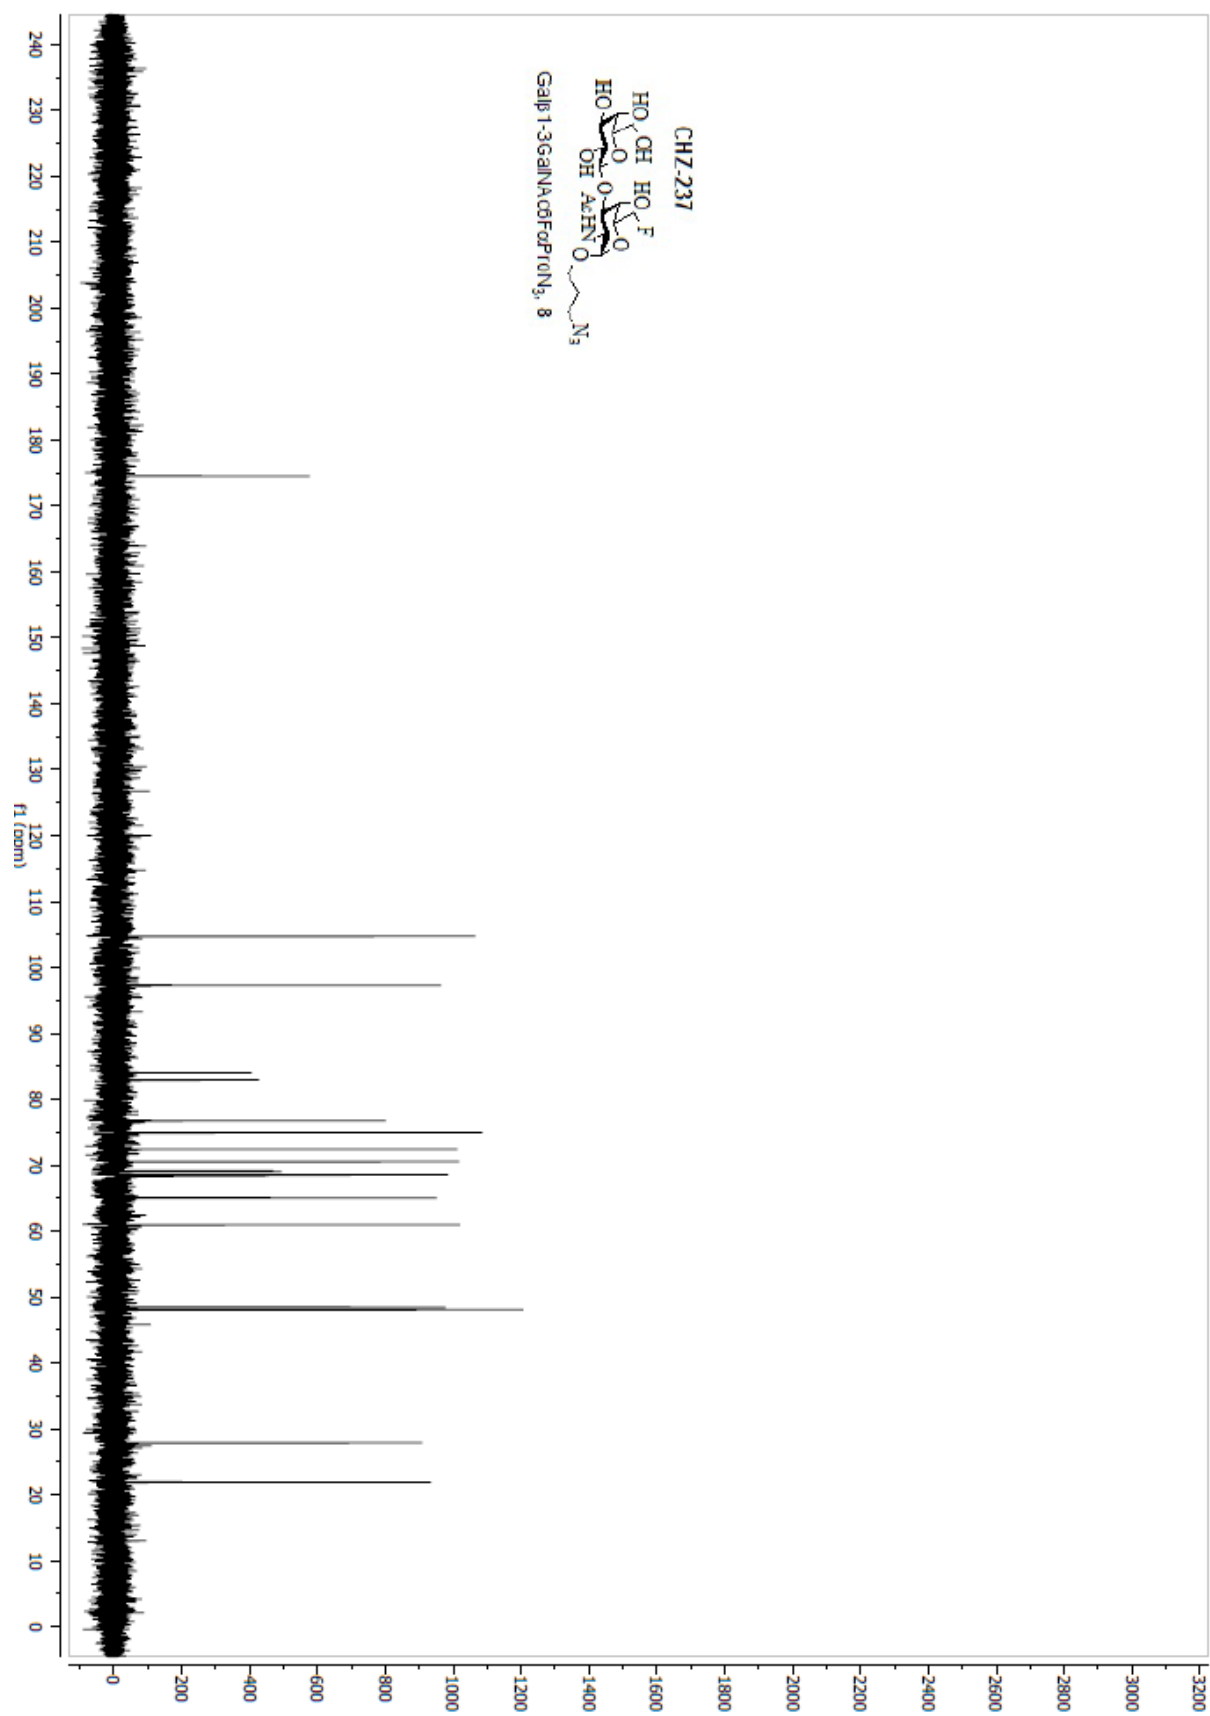

### $^1\text{H}$ NMR spectrum for Gal6F $\beta$ 1-3GalNAc, 9

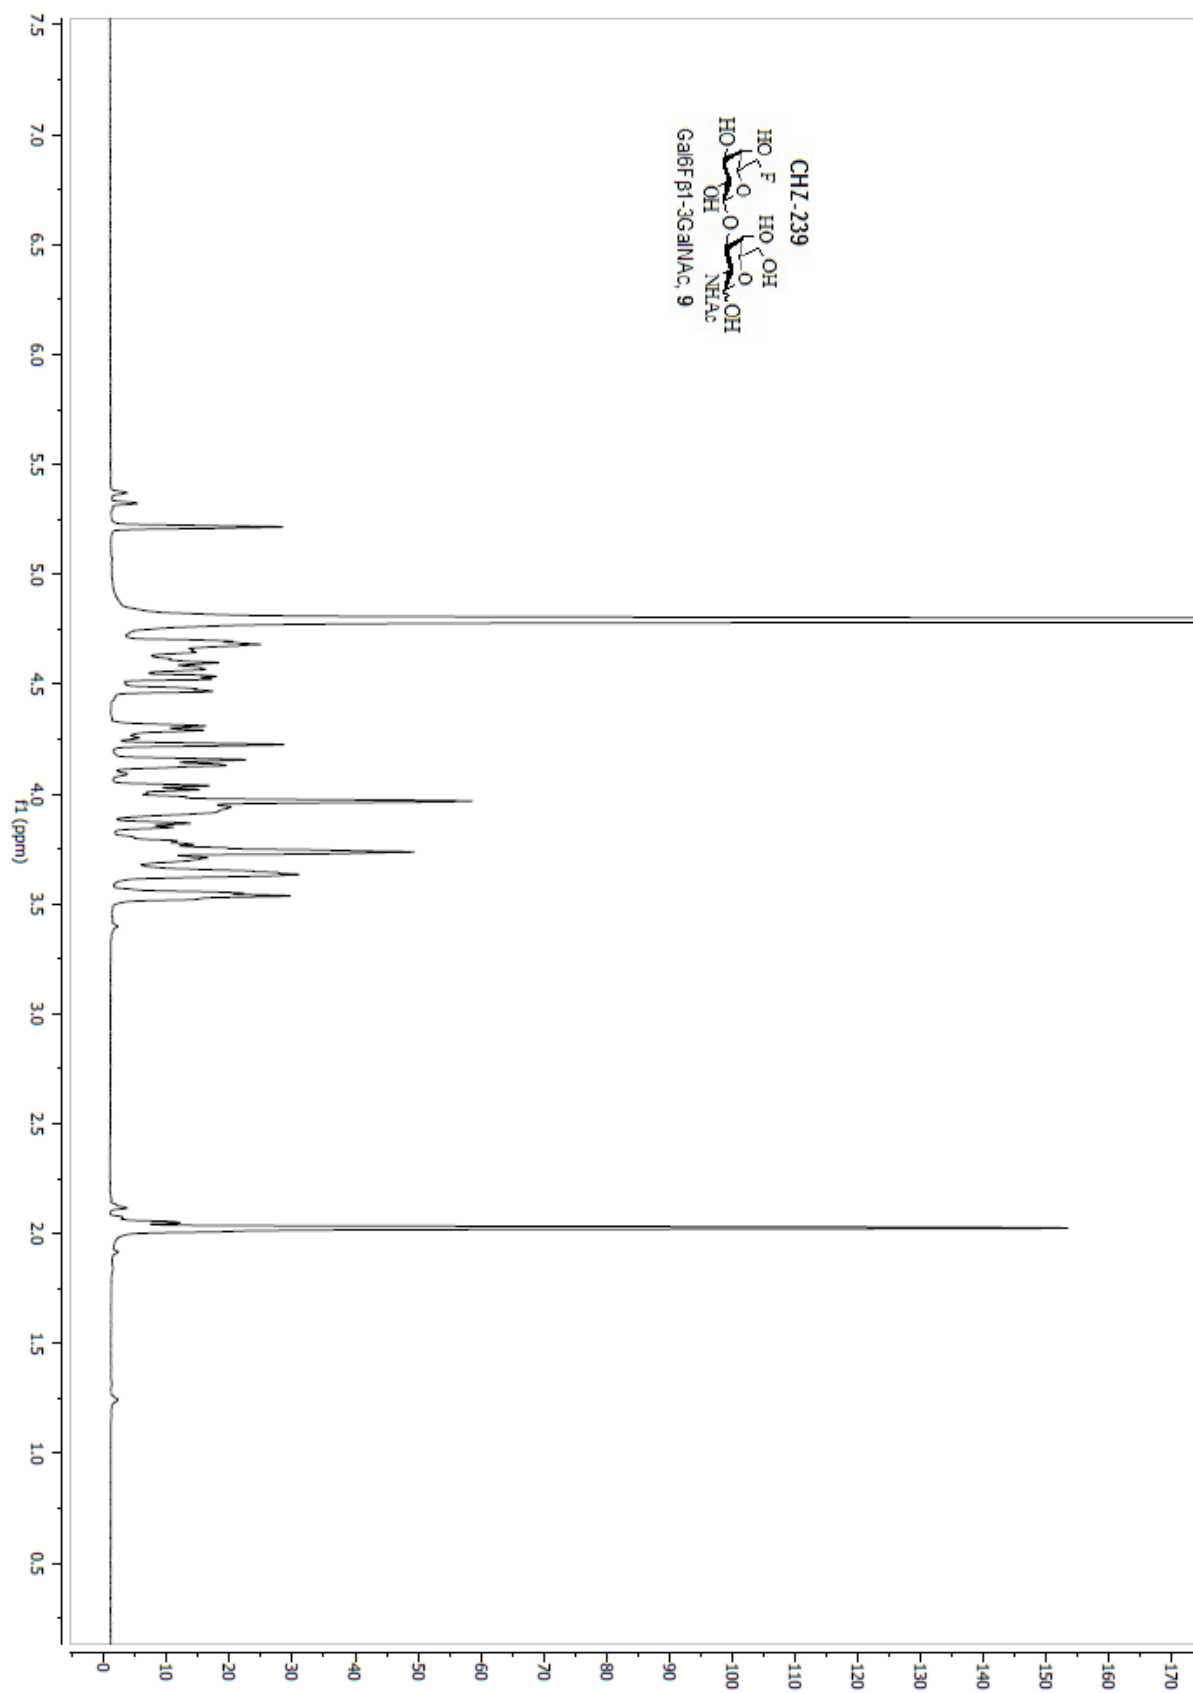

### $^{13}\text{C}$ NMR spectrum for Gal6F $\beta$ 1-3GalNAc, 9

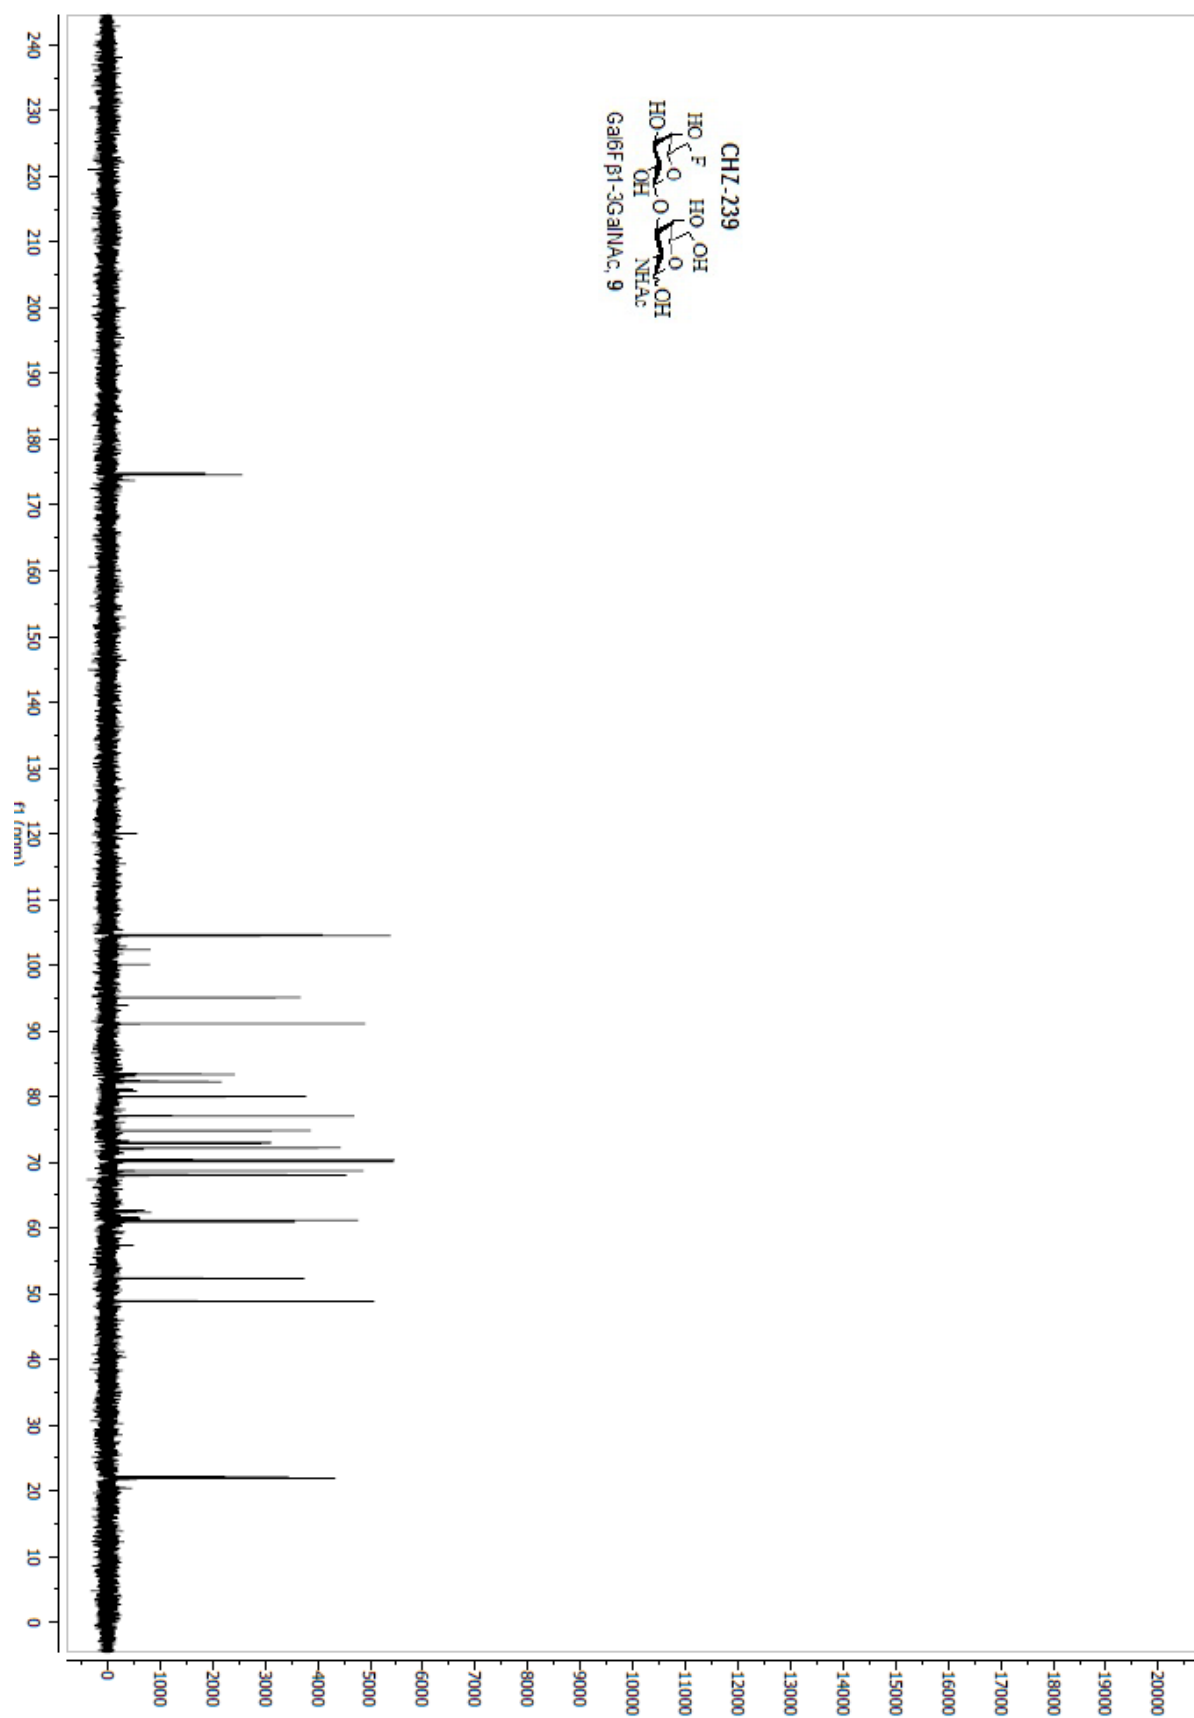

**$^1\text{H}$  NMR spectrum for Gal6F $\beta$ 1-3GalNAc $\alpha$ ProN $_3$ , 10**

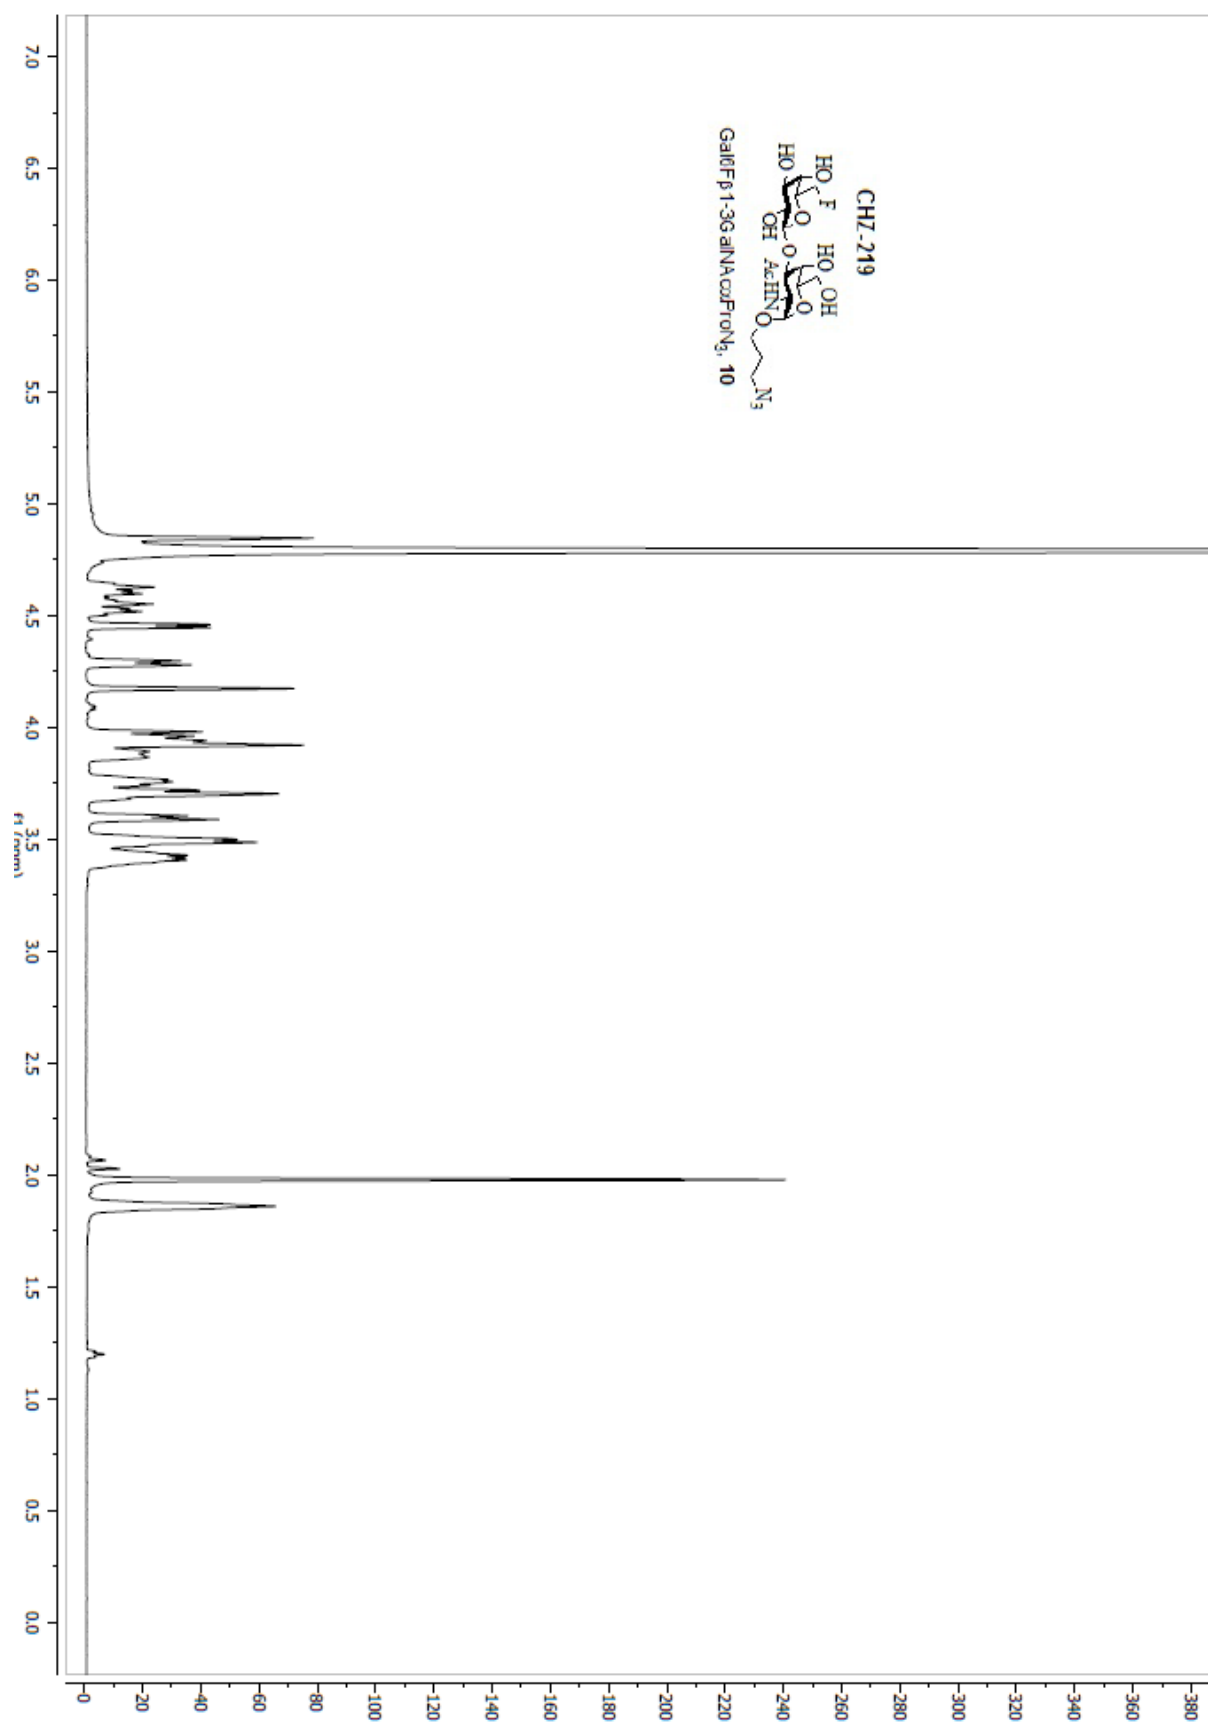

**$^{13}\text{C}$  NMR spectrum for Gal6F $\beta$ 1-3GalNAc $\alpha$ ProN $_3$ , 10**

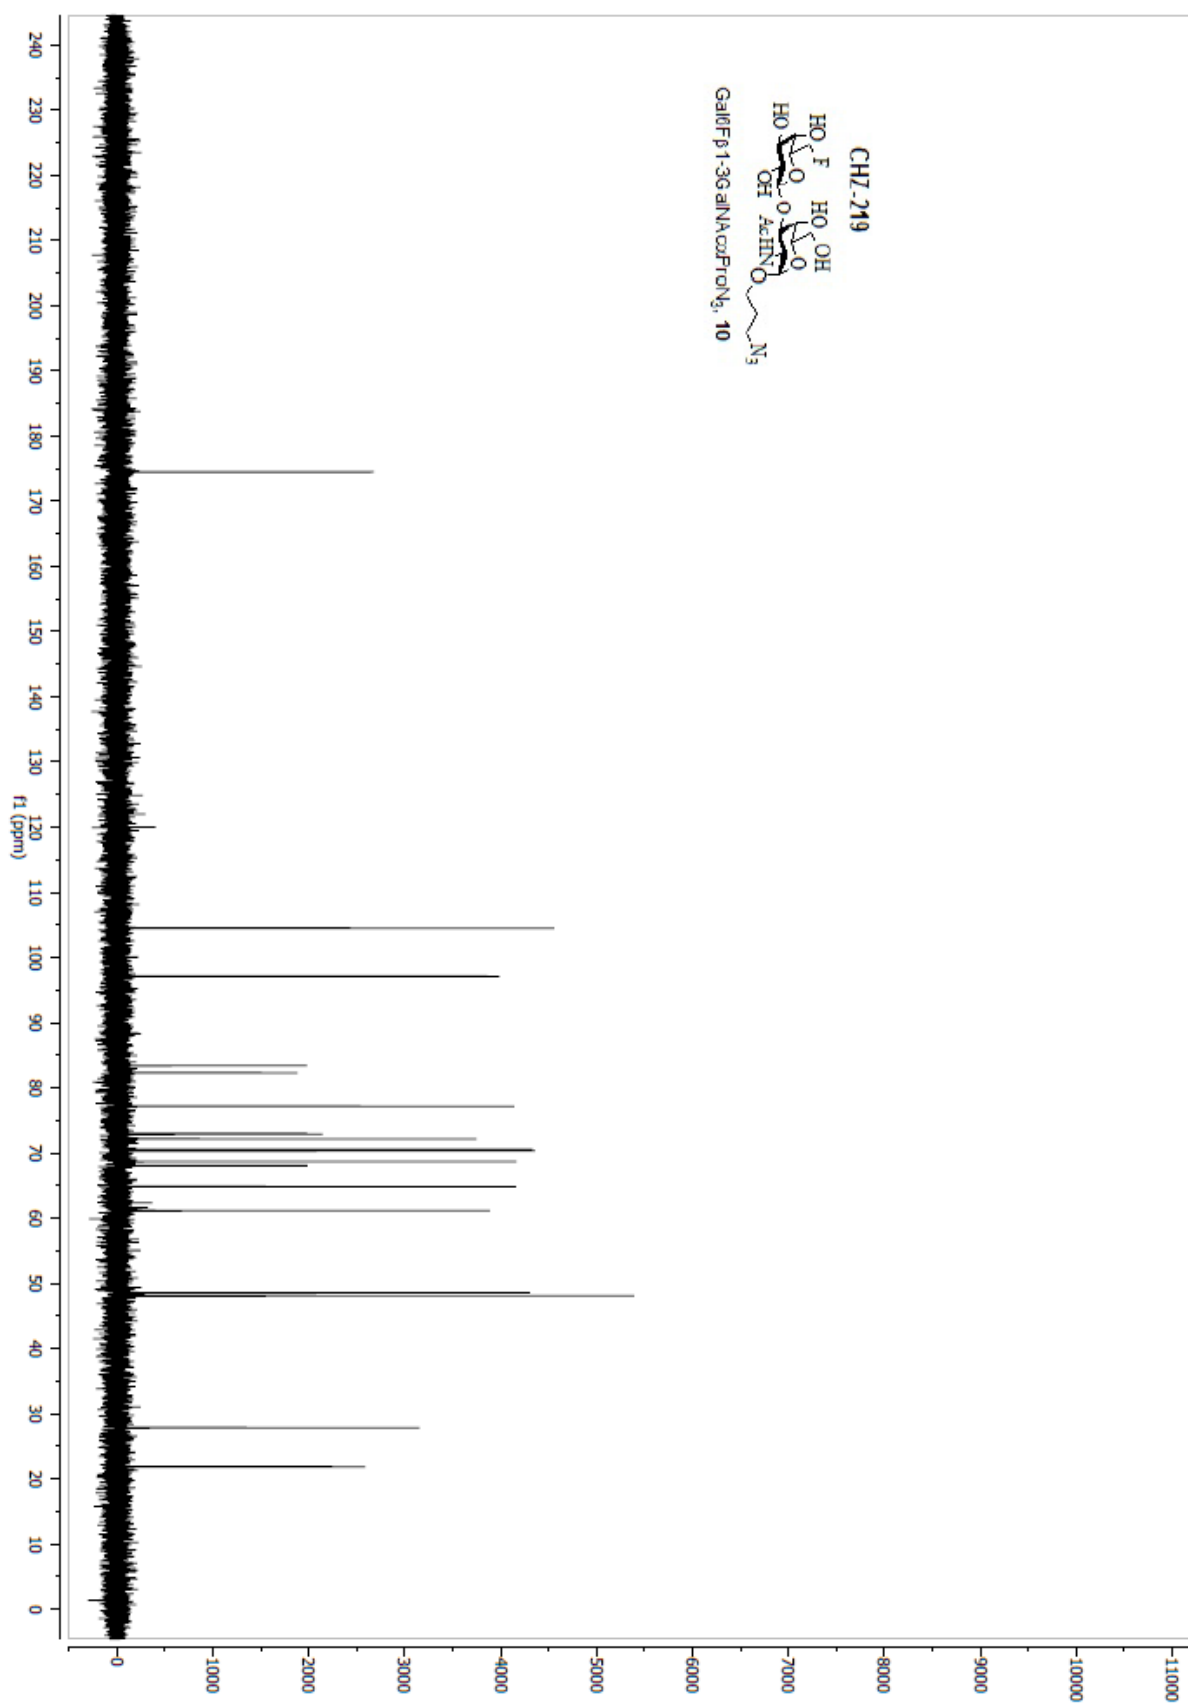

**$^1\text{H}$  NMR spectrum for Gal6F $\beta$ 1-3GalNAc6F $\alpha$ ProN $_3$ , 11**

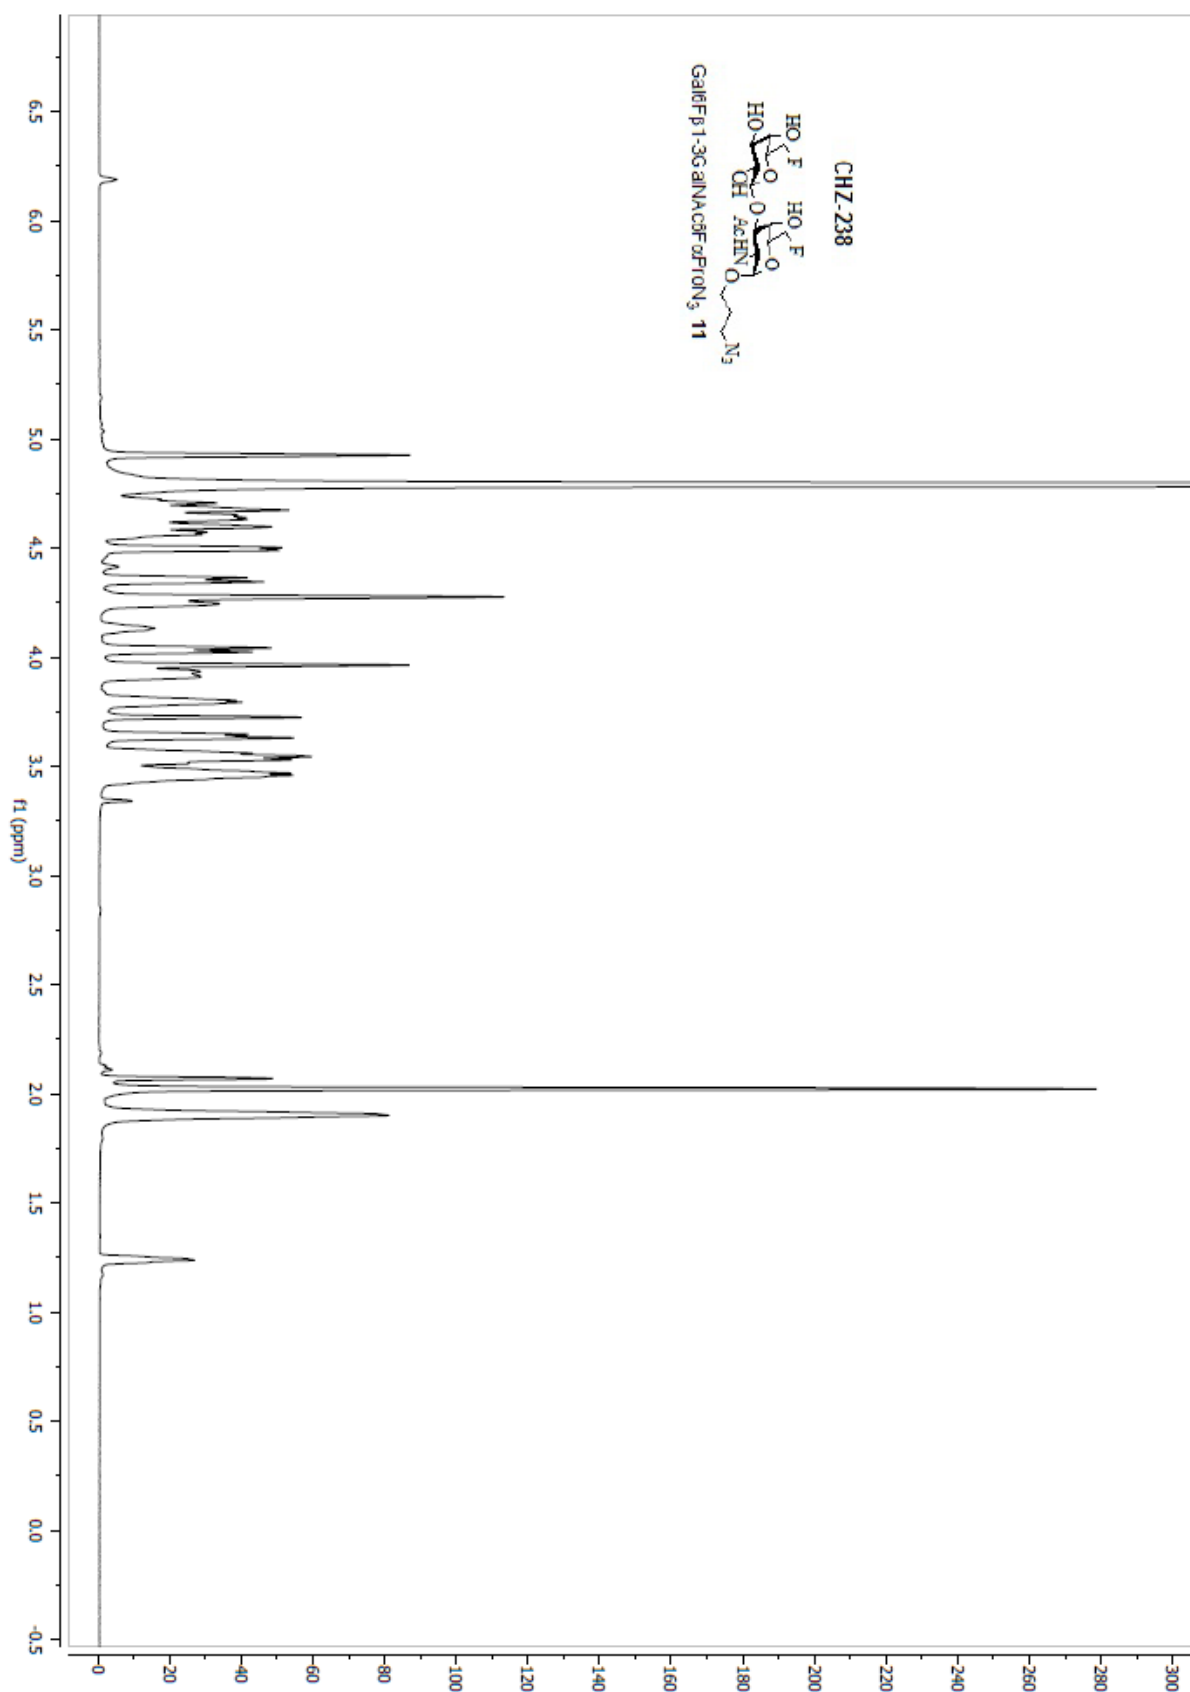

$^{13}\text{C}$  NMR spectrum for Gal6F $\beta$ 1-3GalNAc6F $\alpha$ ProN $_3$ , 11

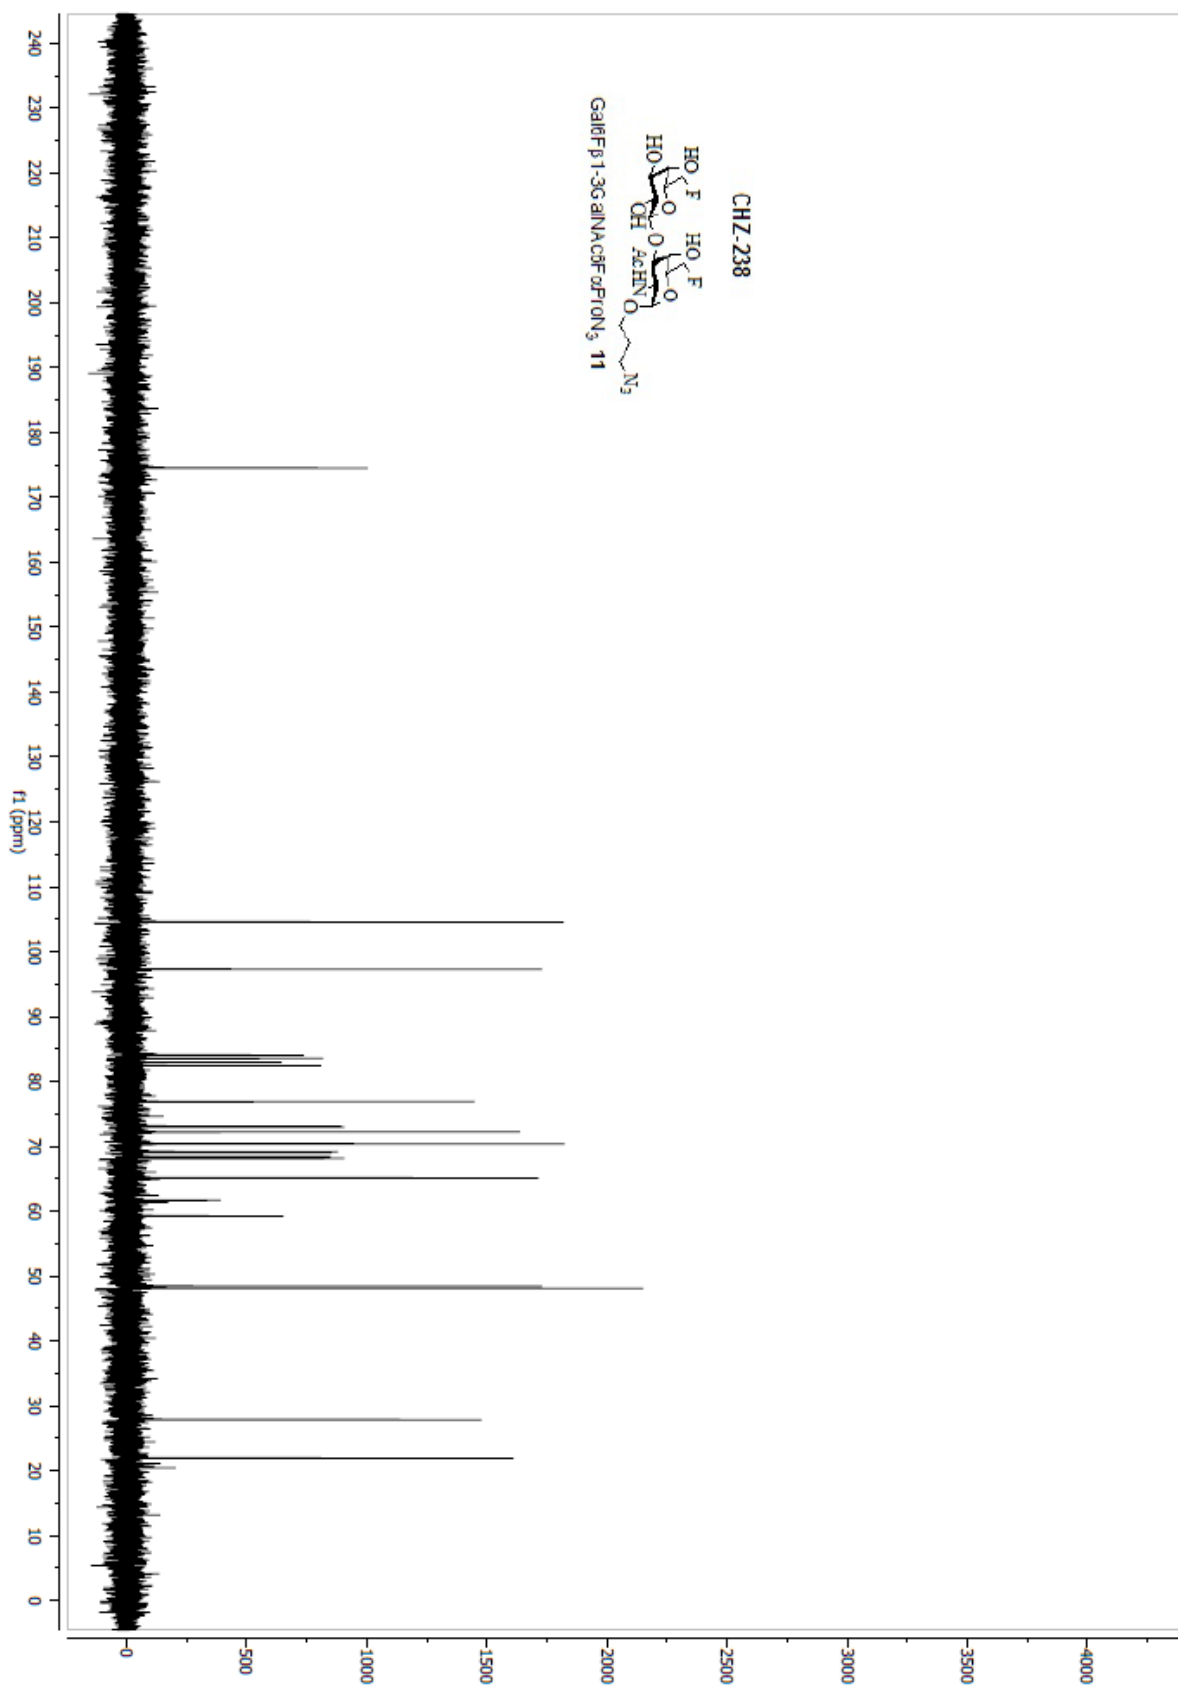



**$^1\text{H}$  NMR spectrum for Neu5Ac $\alpha$ 2-3Gal $\beta$ 1-3GalNAc, 12**

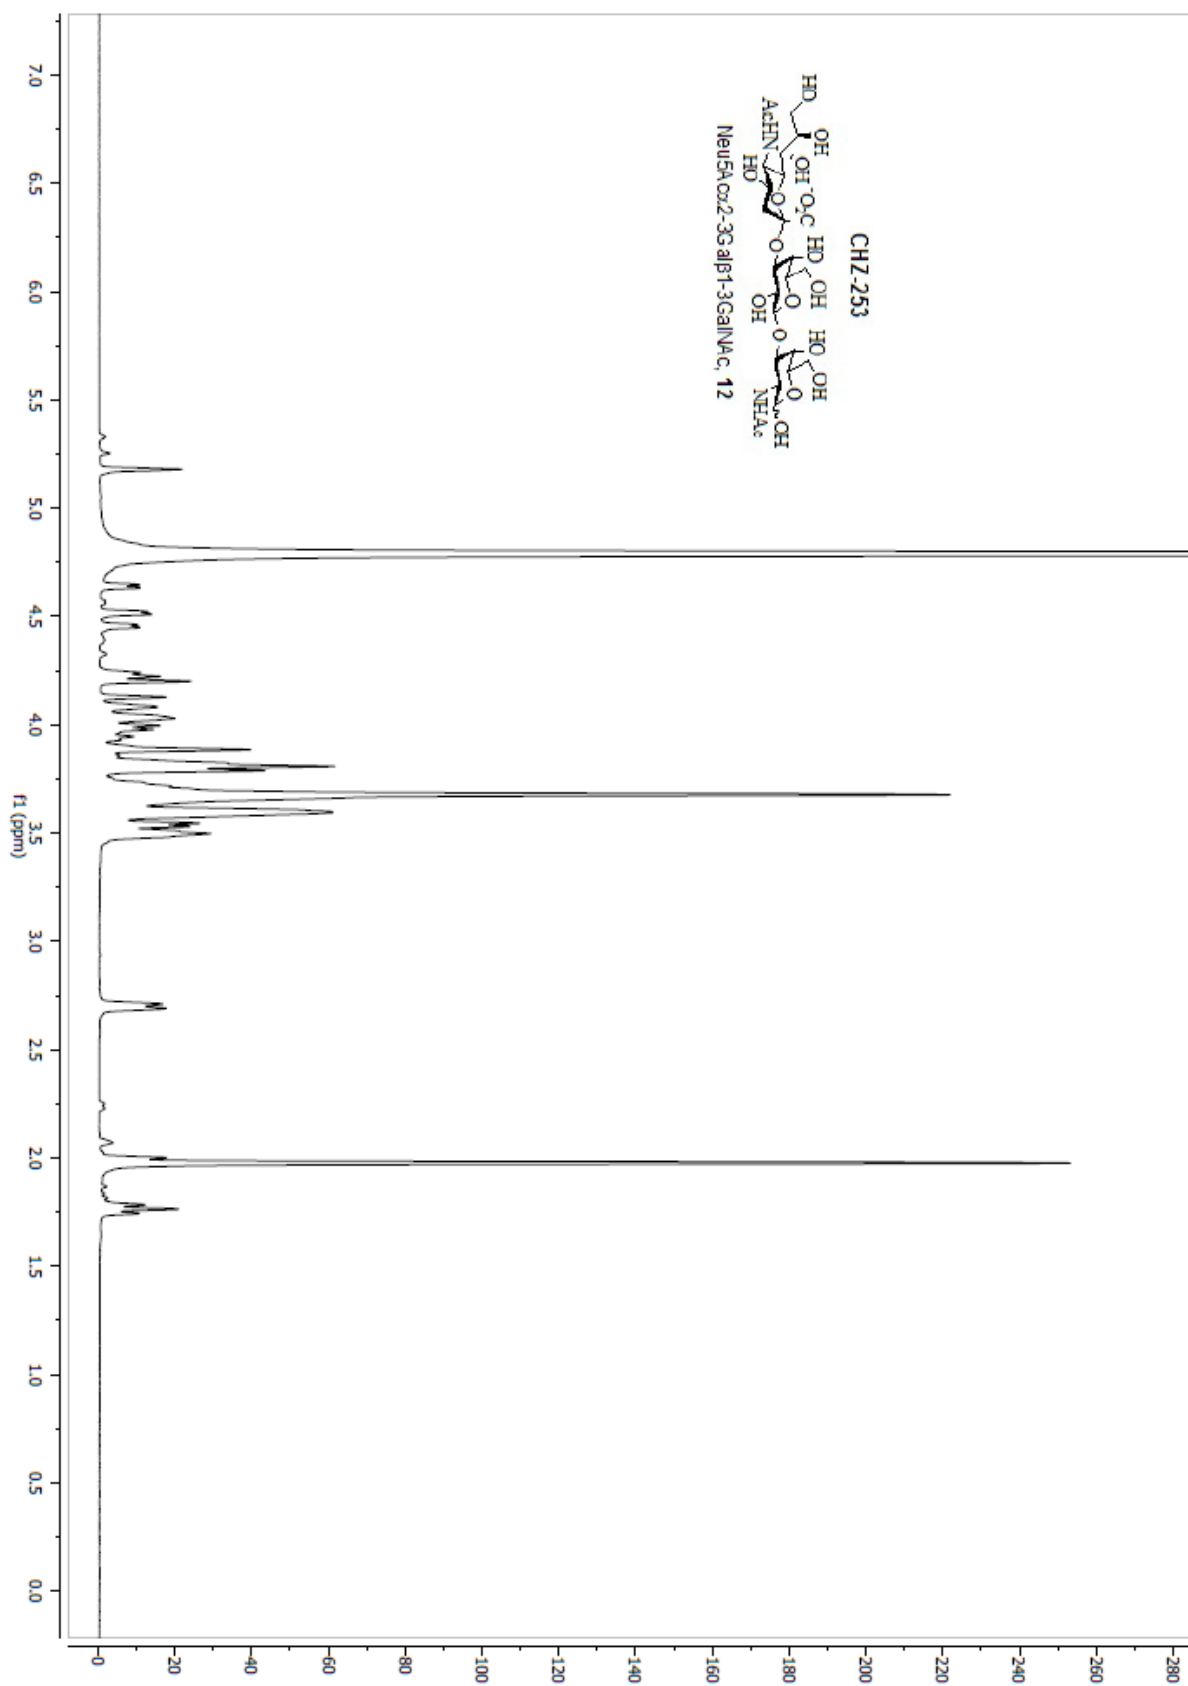



**<sup>1</sup>H NMR spectrum for Neu5Acα2-3Galβ1-3GalNAc6FαProN<sub>3</sub>, 14**

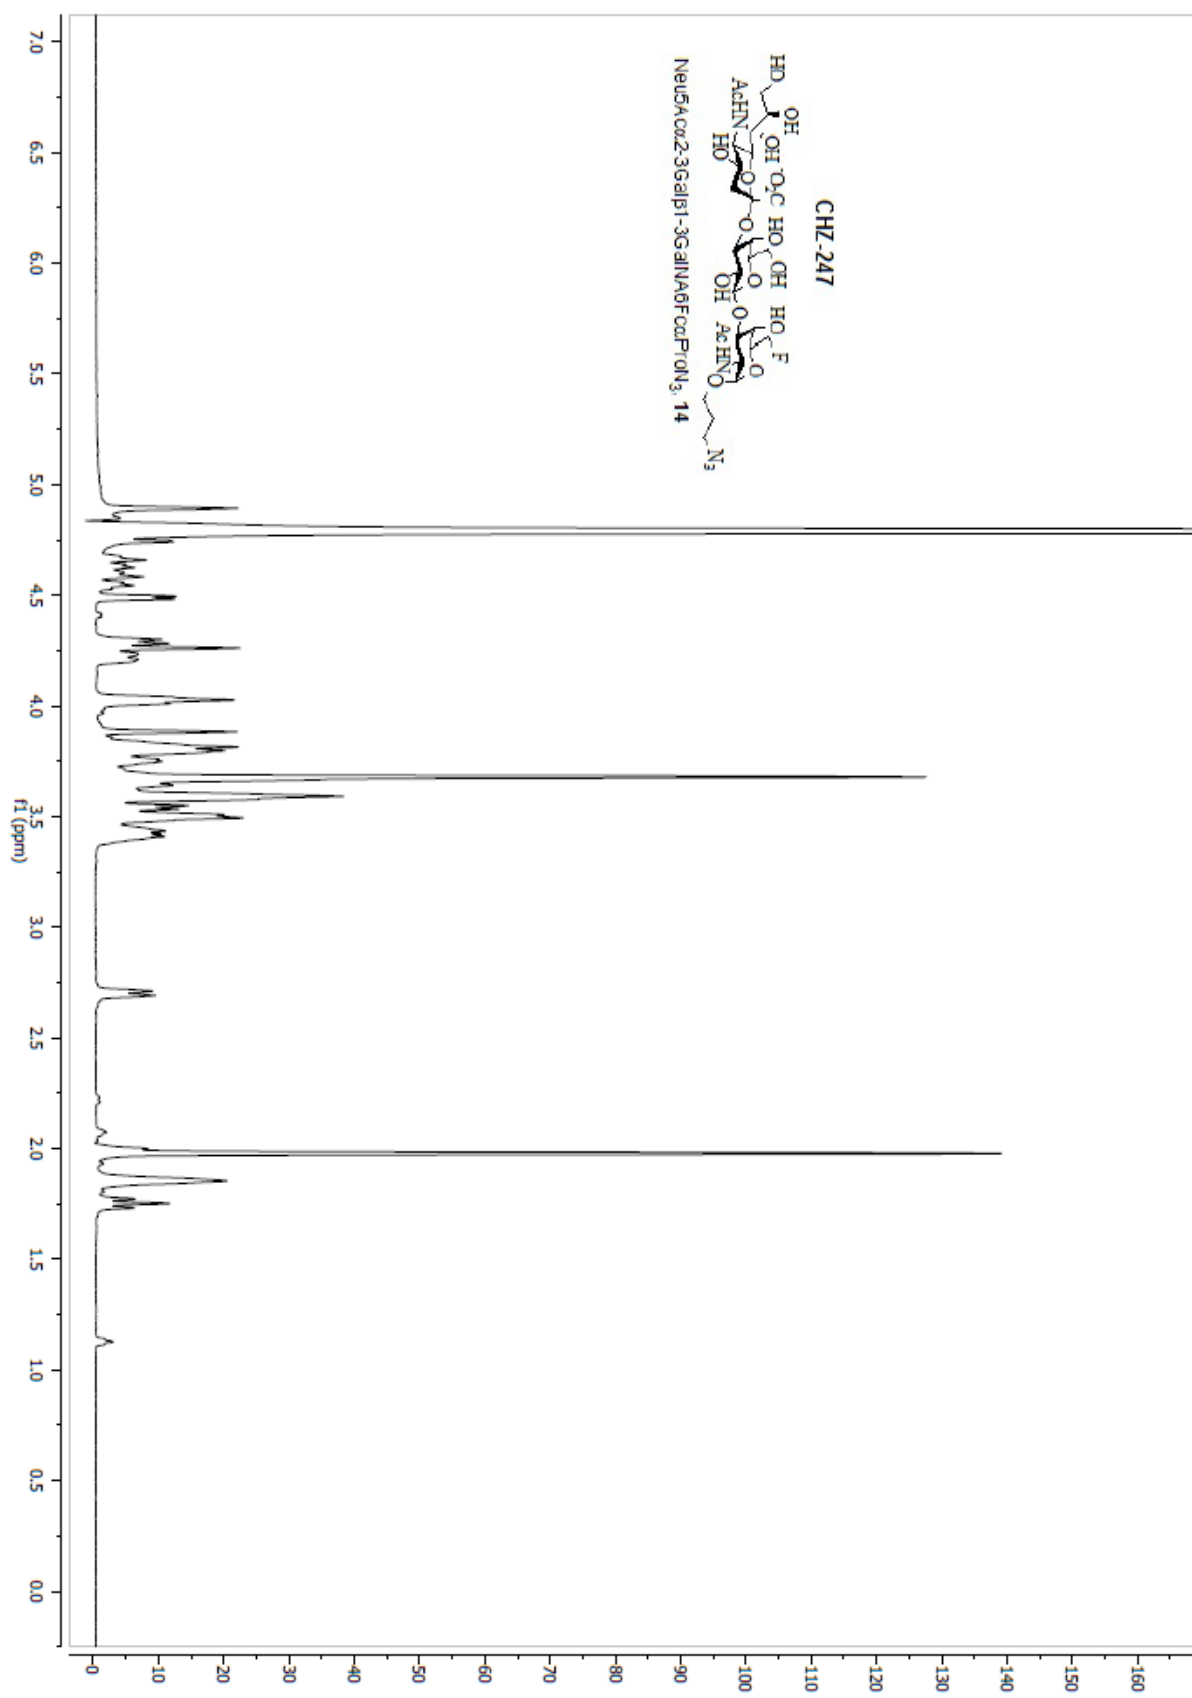

$^{13}\text{C}$  NMR spectrum for Neu5Ac $\alpha$ 2-3Gal $\beta$ 1-3GalNAc6F $\alpha$ ProN $_3$ , 14

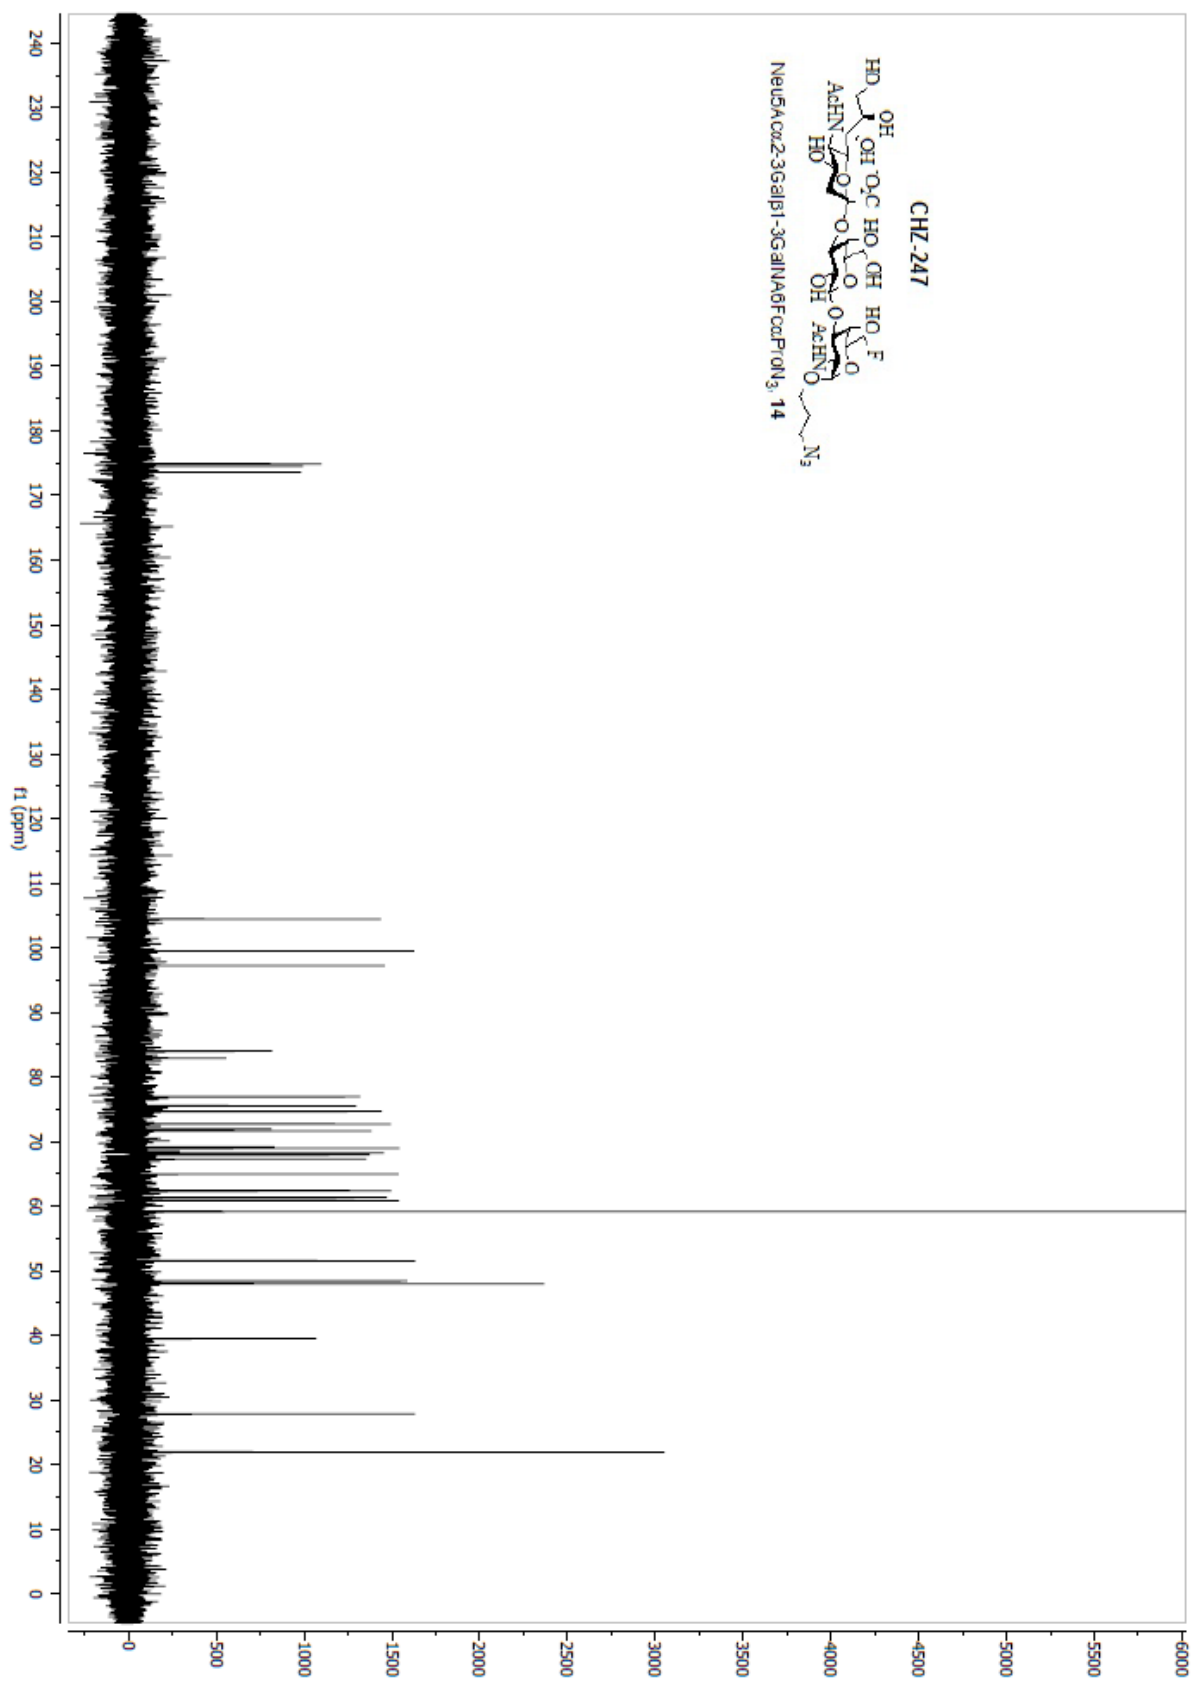

**$^1\text{H}$  NMR spectrum for Neu5Ac $\alpha$ 2-3Gal6F $\beta$ 1-3GalNAc, 15**

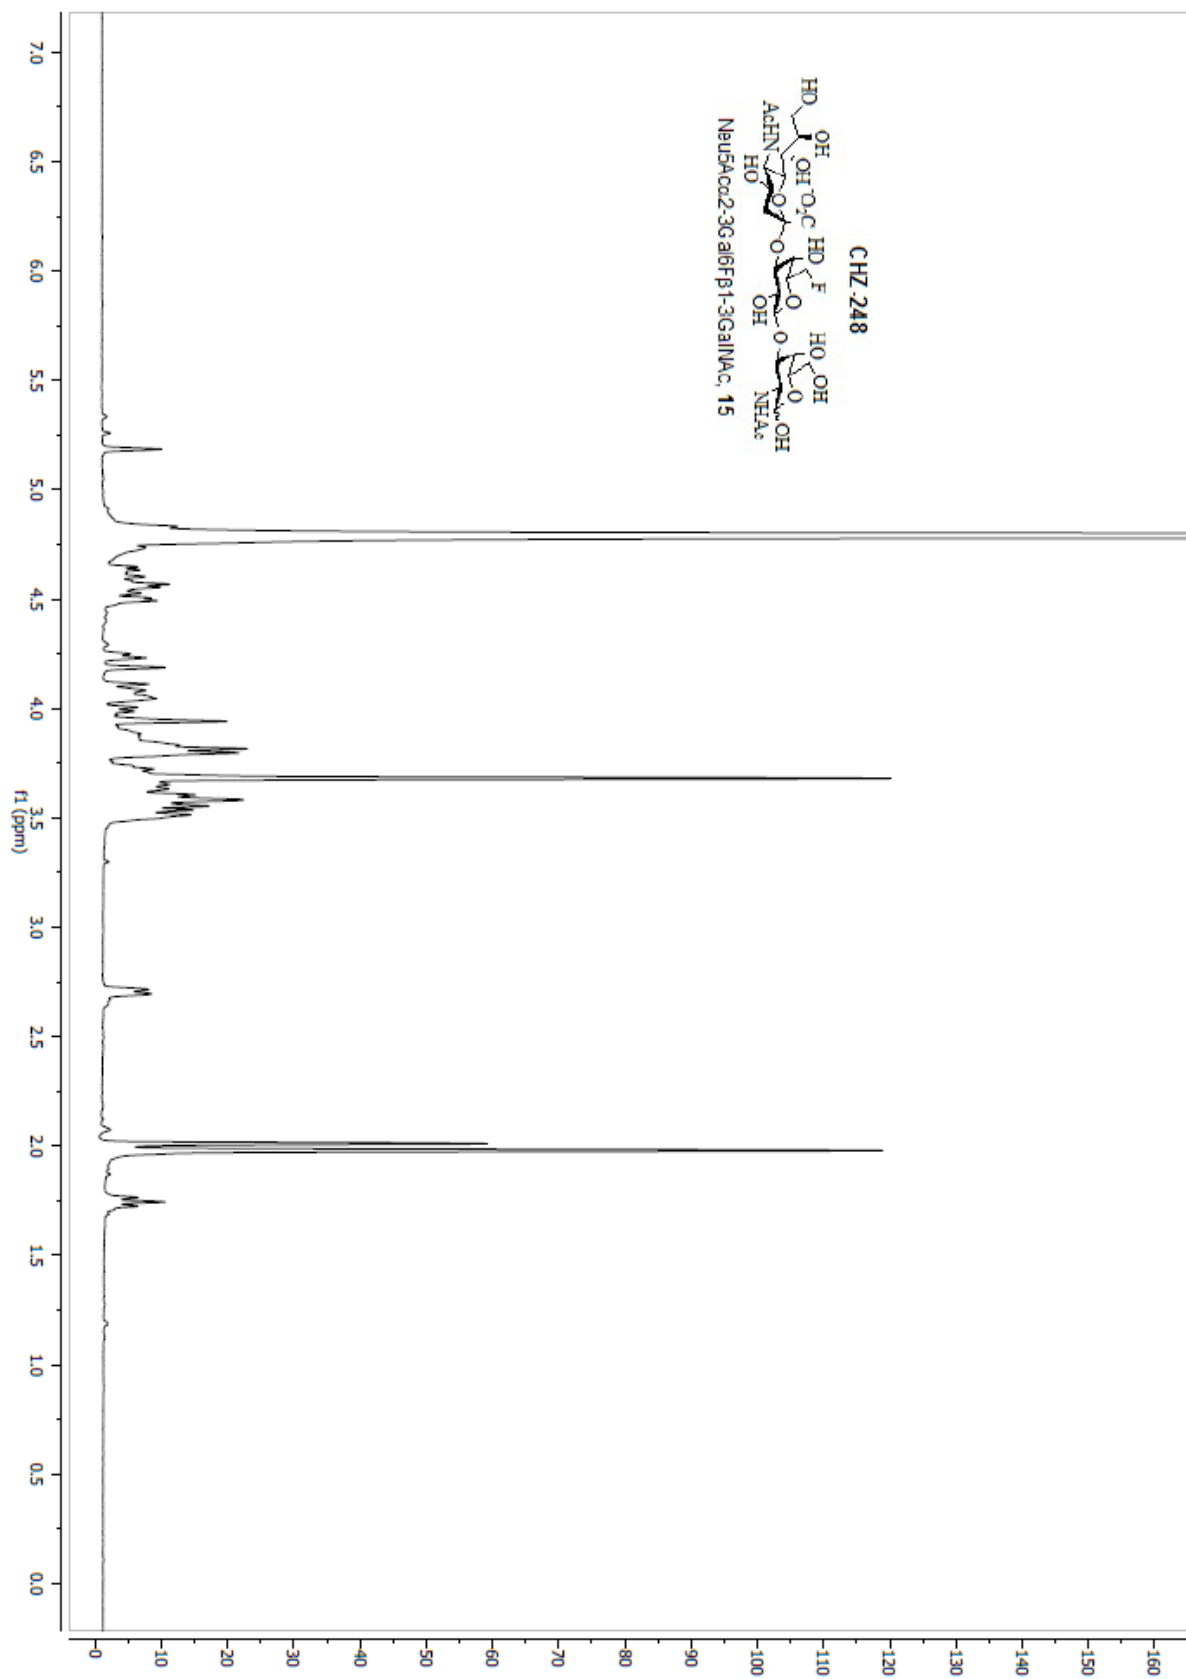

$^{13}\text{C}$  NMR spectrum for Neu5Ac $\alpha$ 2-3Gal6F $\beta$ 1-3GalNAc, 15

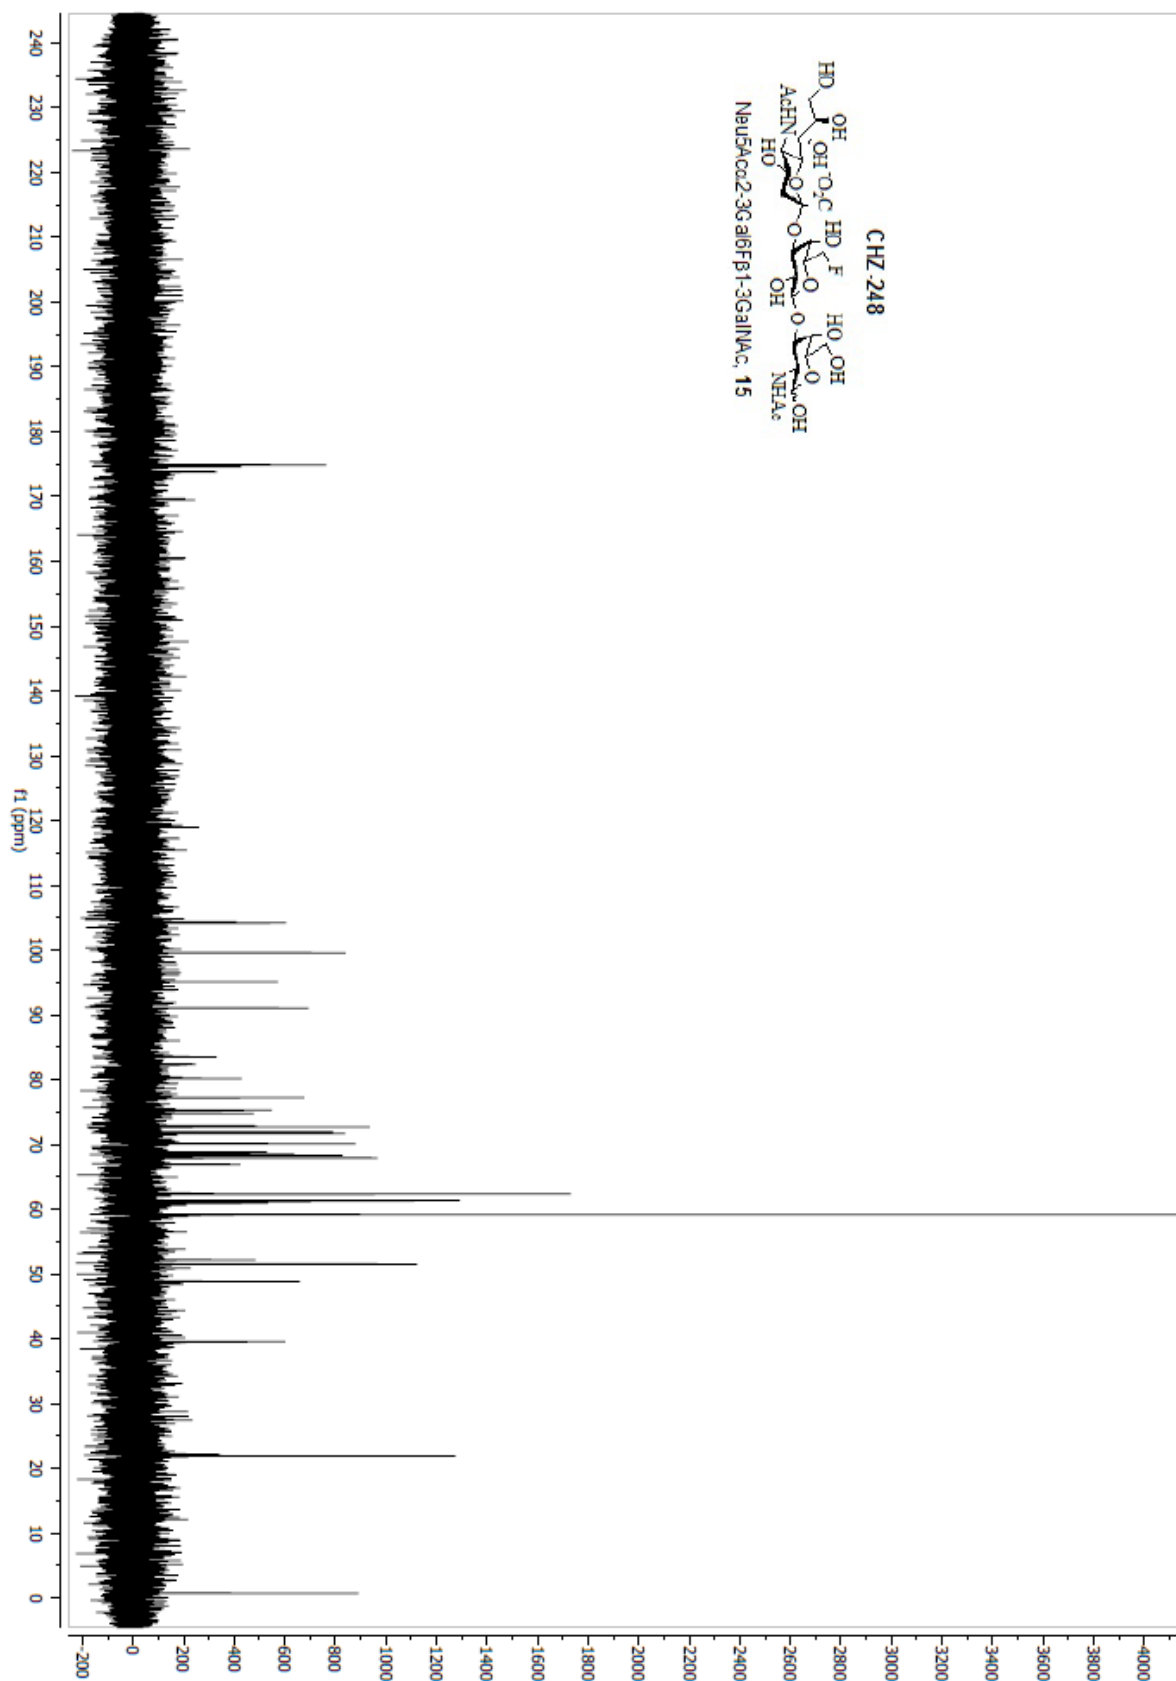

$^1\text{H}$  NMR spectrum for Neu5Ac $\alpha$ 2-3Gal $\beta$ 1-3GalNAc6F $\alpha$ ProN $_3$ , 16

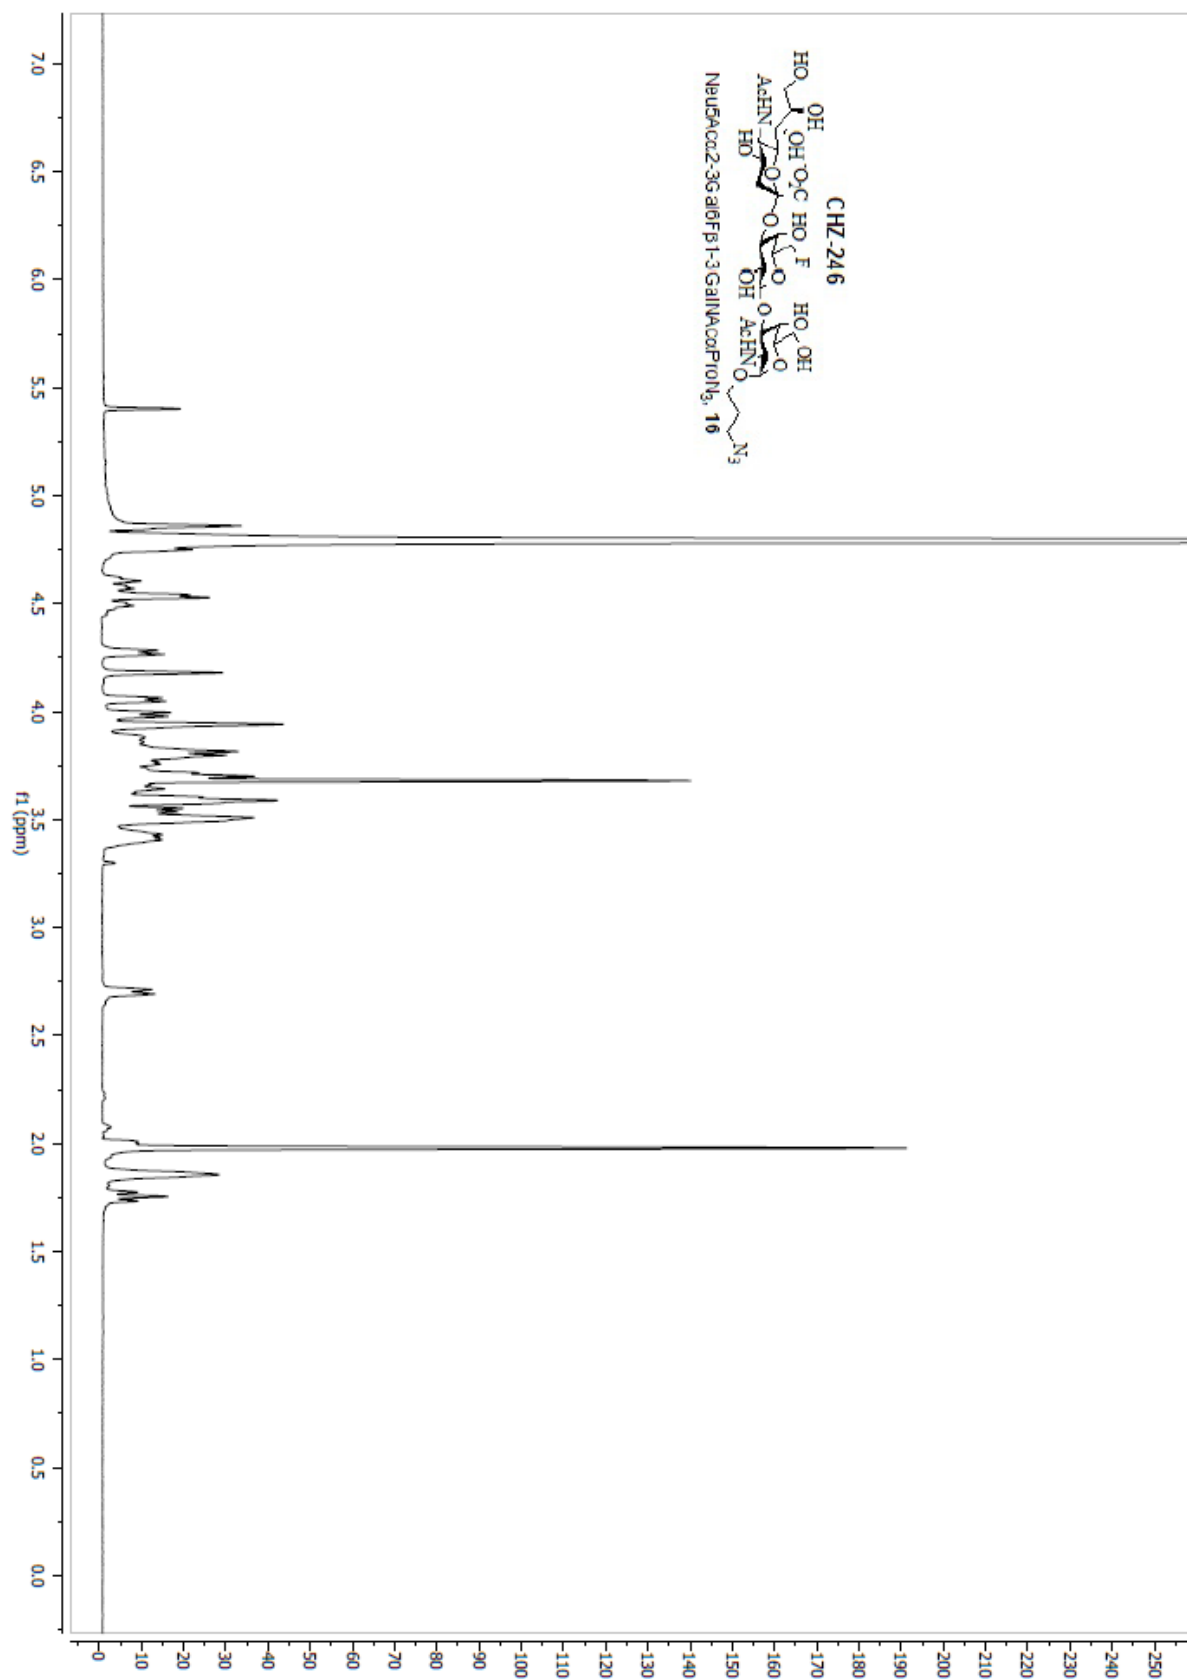

$^{13}\text{C}$  NMR spectrum for Neu5Ac $\alpha$ 2-3Gal $\beta$ 1-3GalNAc6F $\alpha$ ProN $_3$ , 16

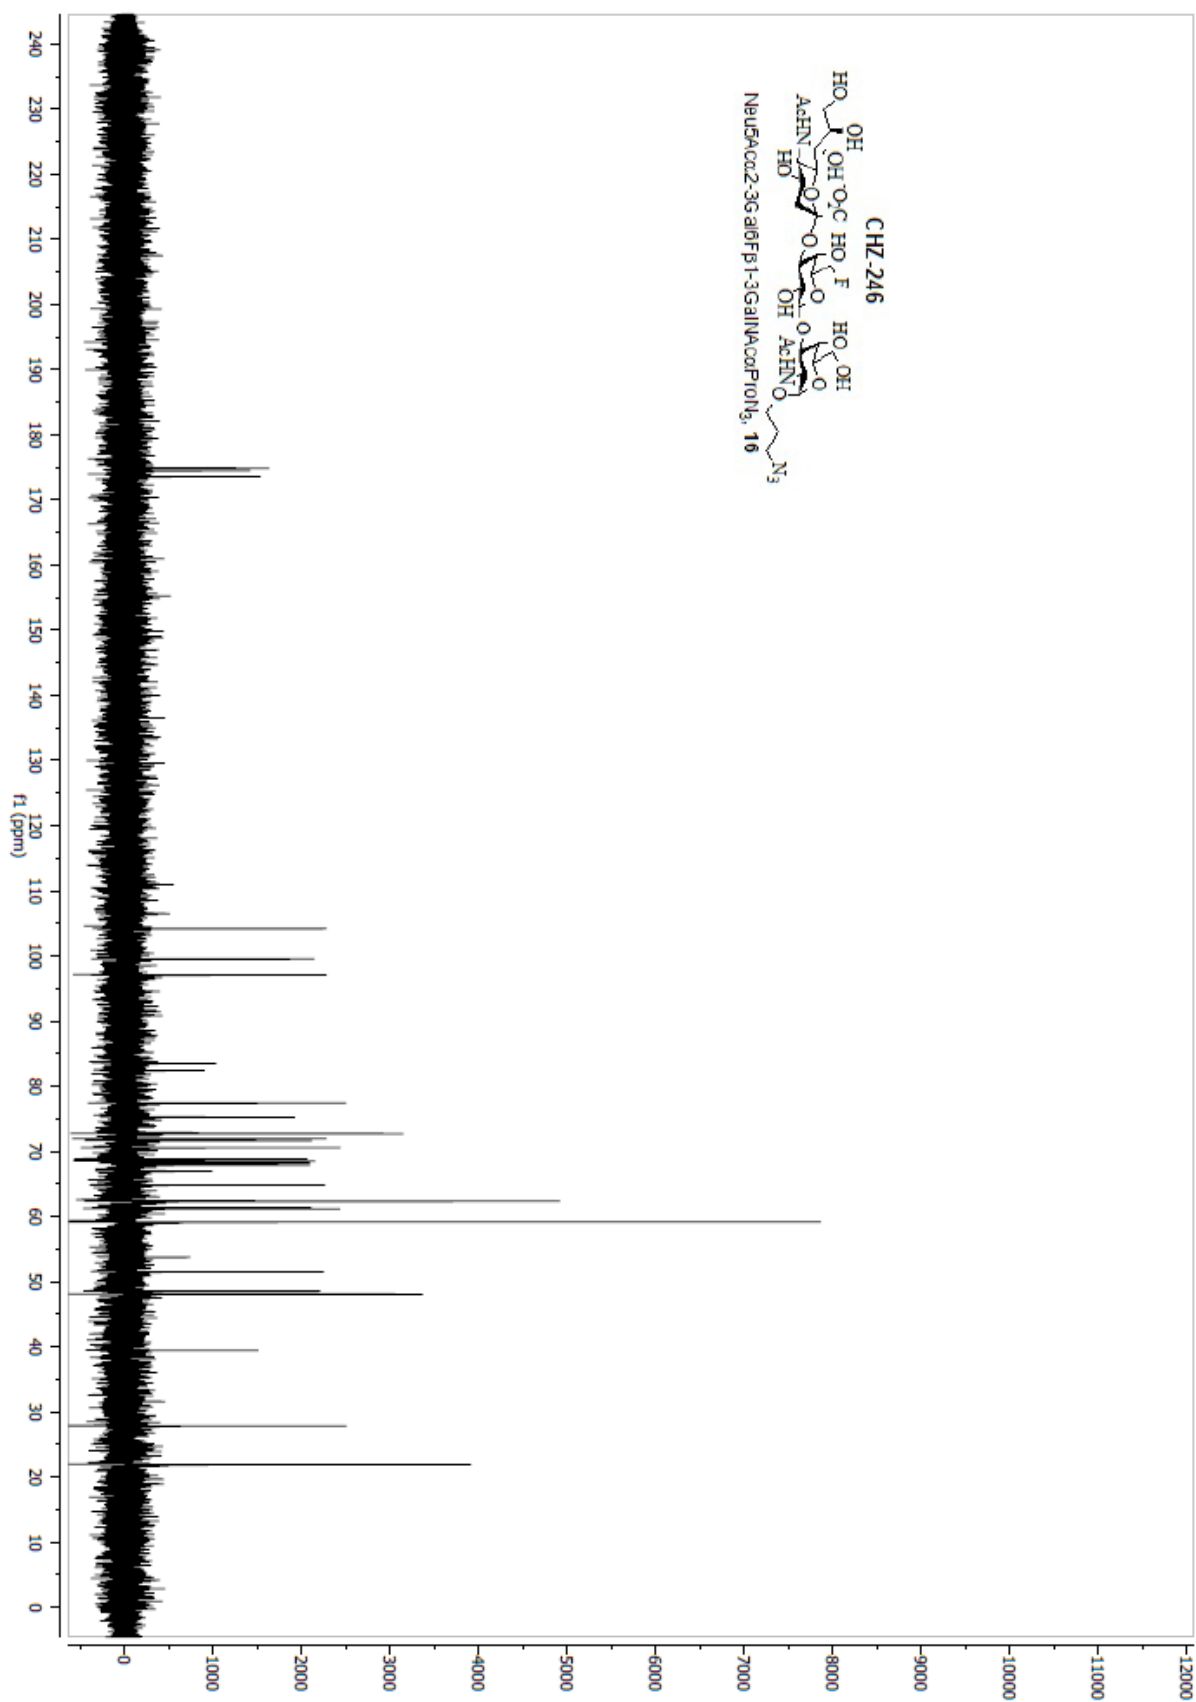



**$^1\text{H}$  NMR spectrum for Neu5Ac $\alpha$ 2-3Gal6F $\beta$ 1-3GalNAc6F $\alpha$ ProN $_3$ , 17**

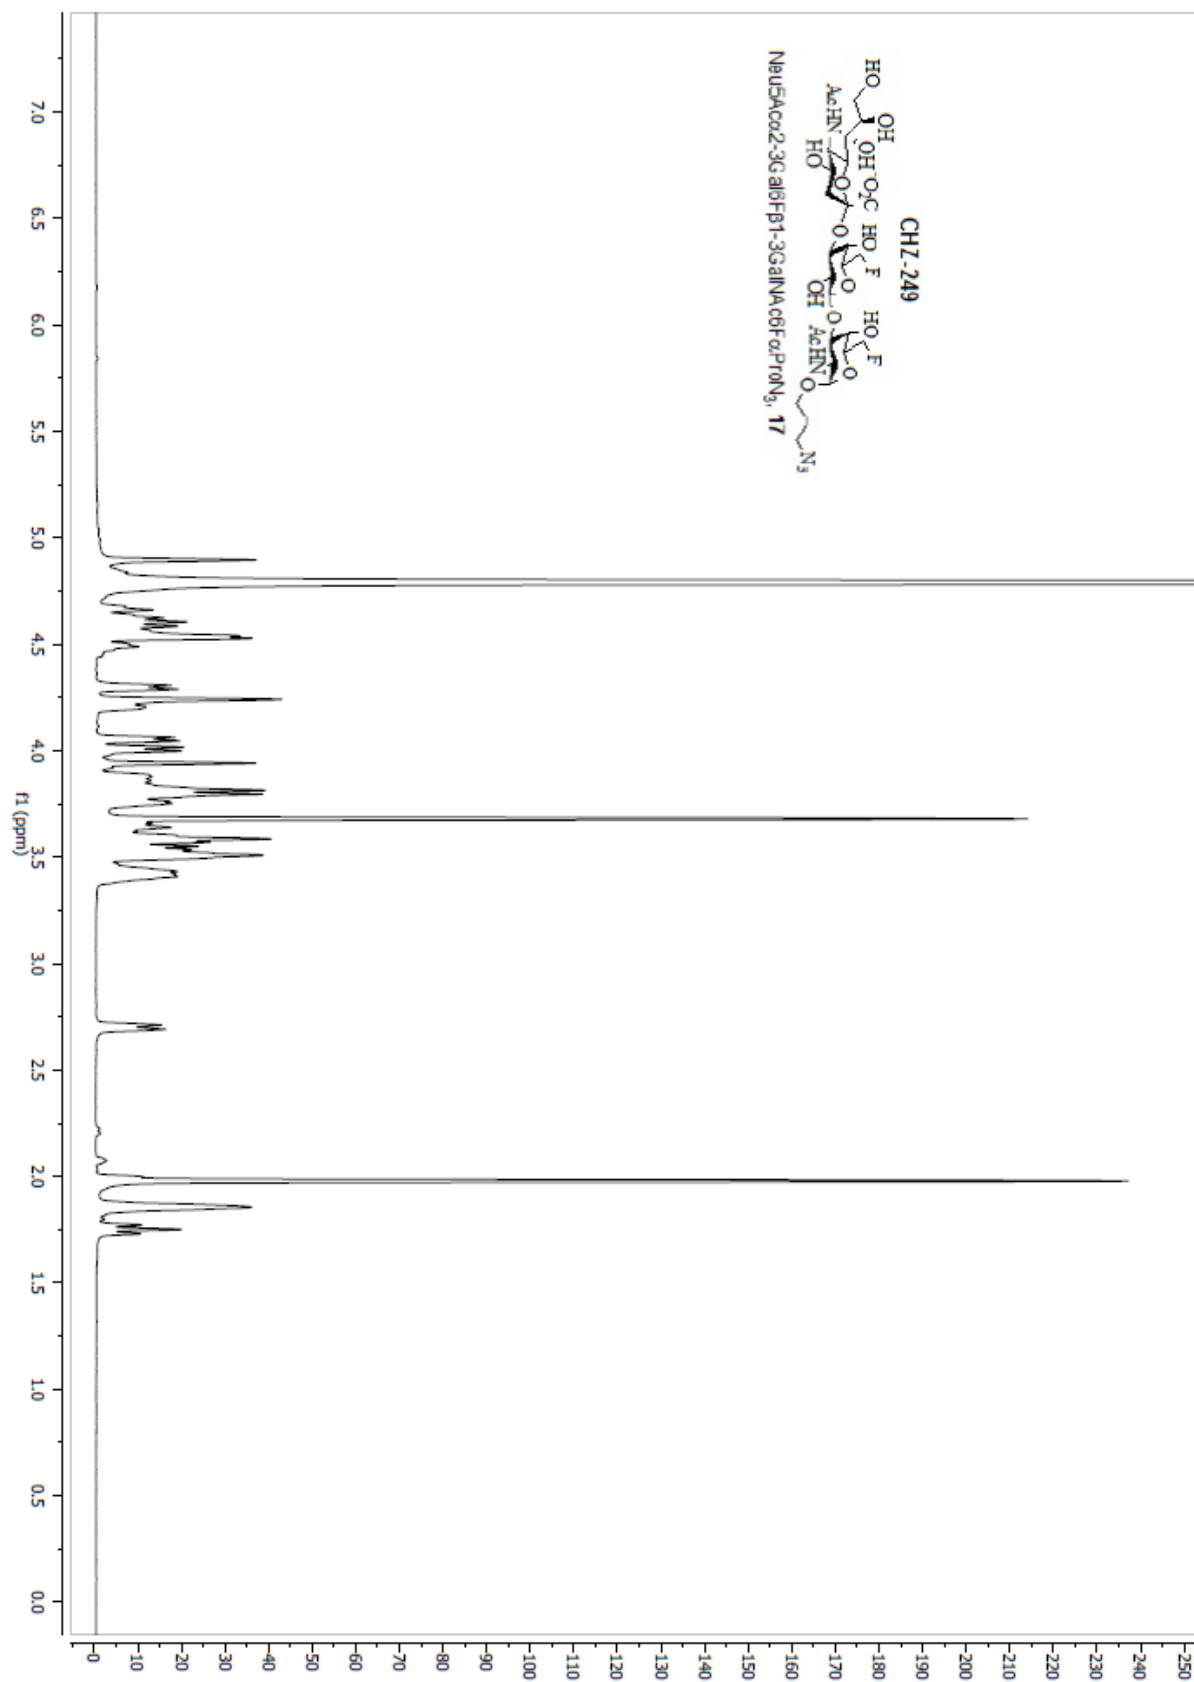

$^{13}\text{C}$  NMR spectrum for Neu5Ac $\alpha$ 2-3Gal6F $\beta$ 1-3GalNAc6F $\alpha$ ProN $_3$ , 17

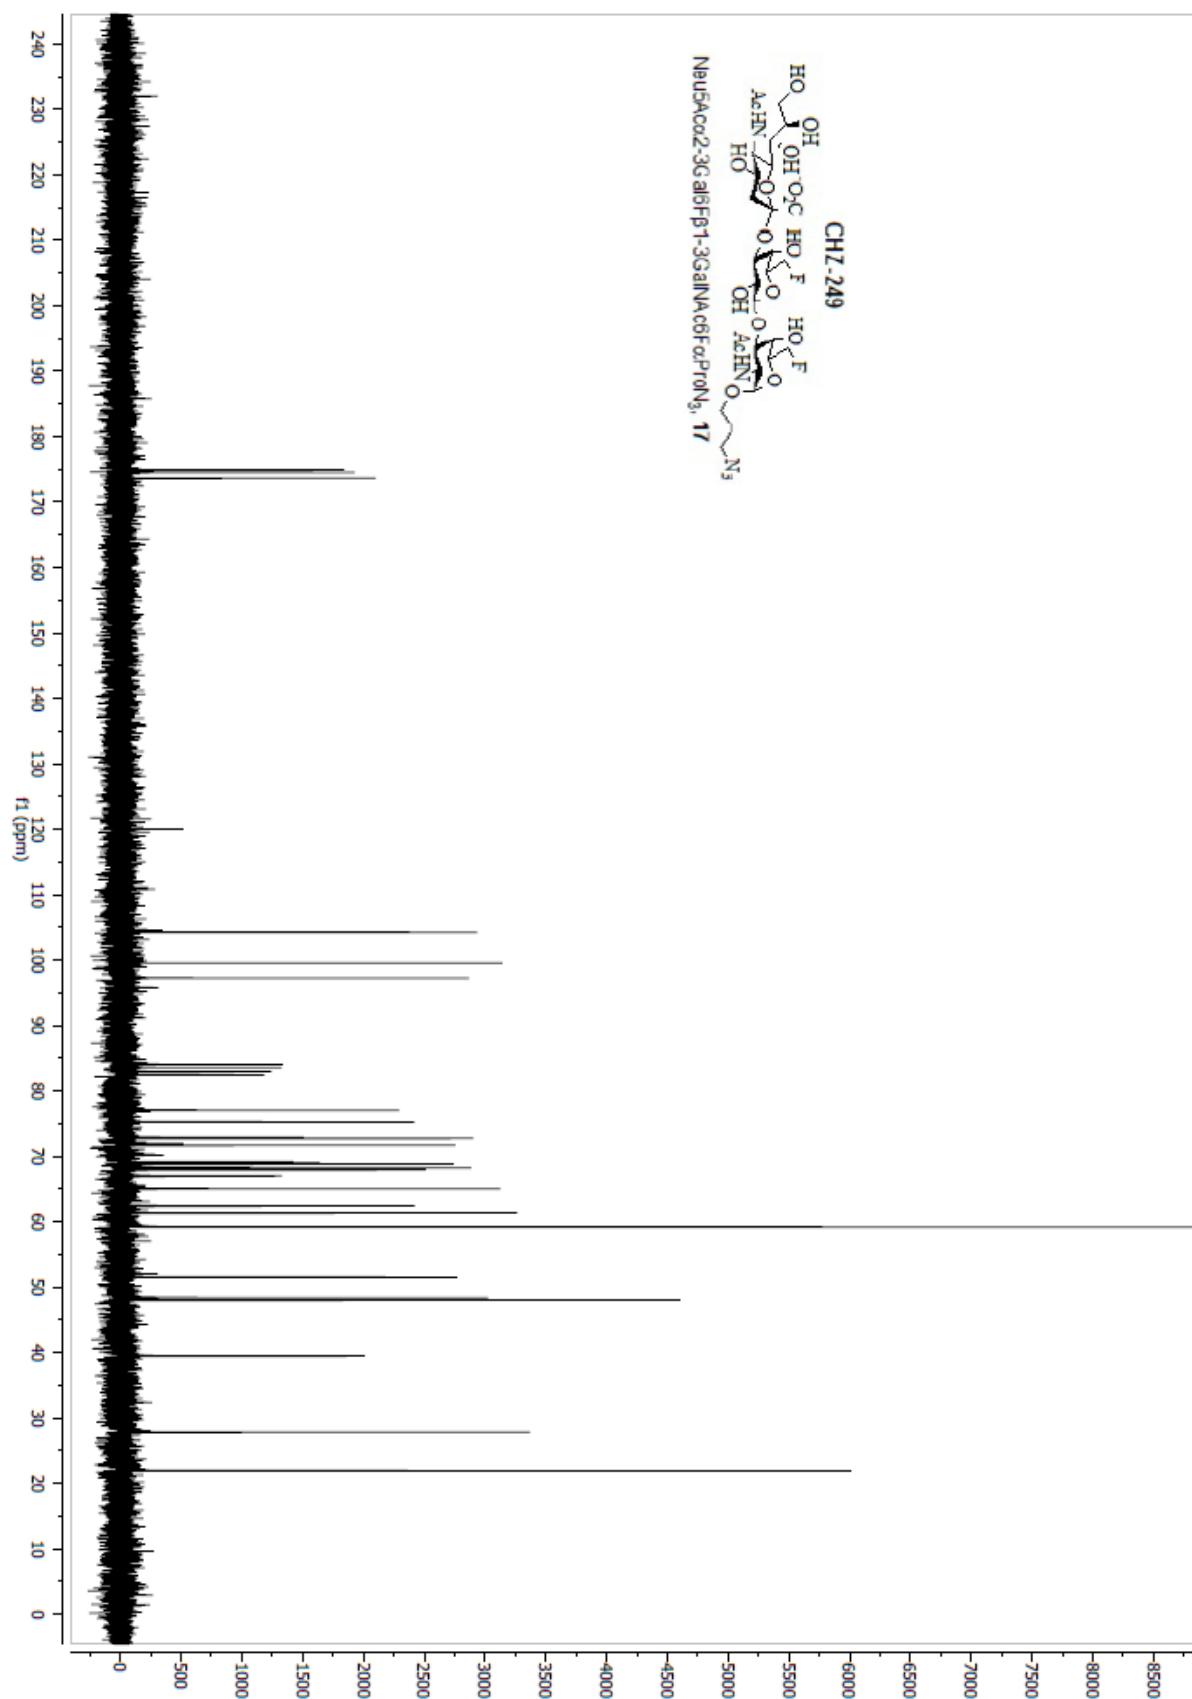

### <sup>1</sup>H NMR spectrum for Gal2F, 18

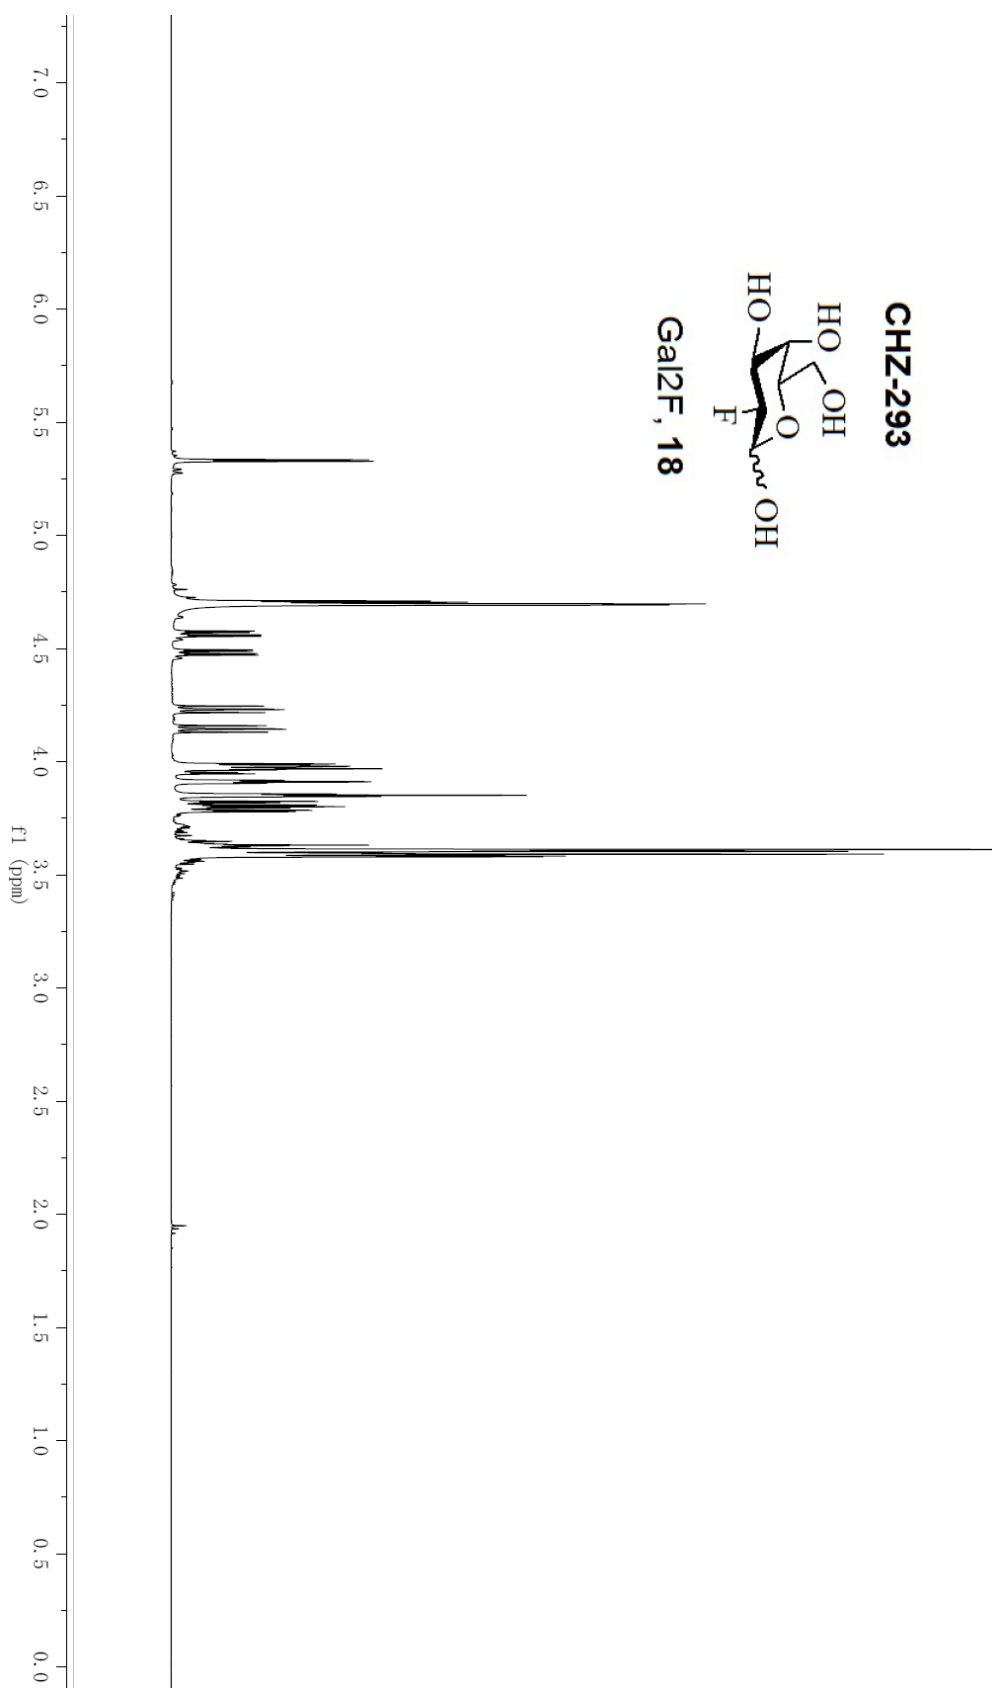

**<sup>1</sup>H NMR spectrum for Gal2F-1-P, 19**

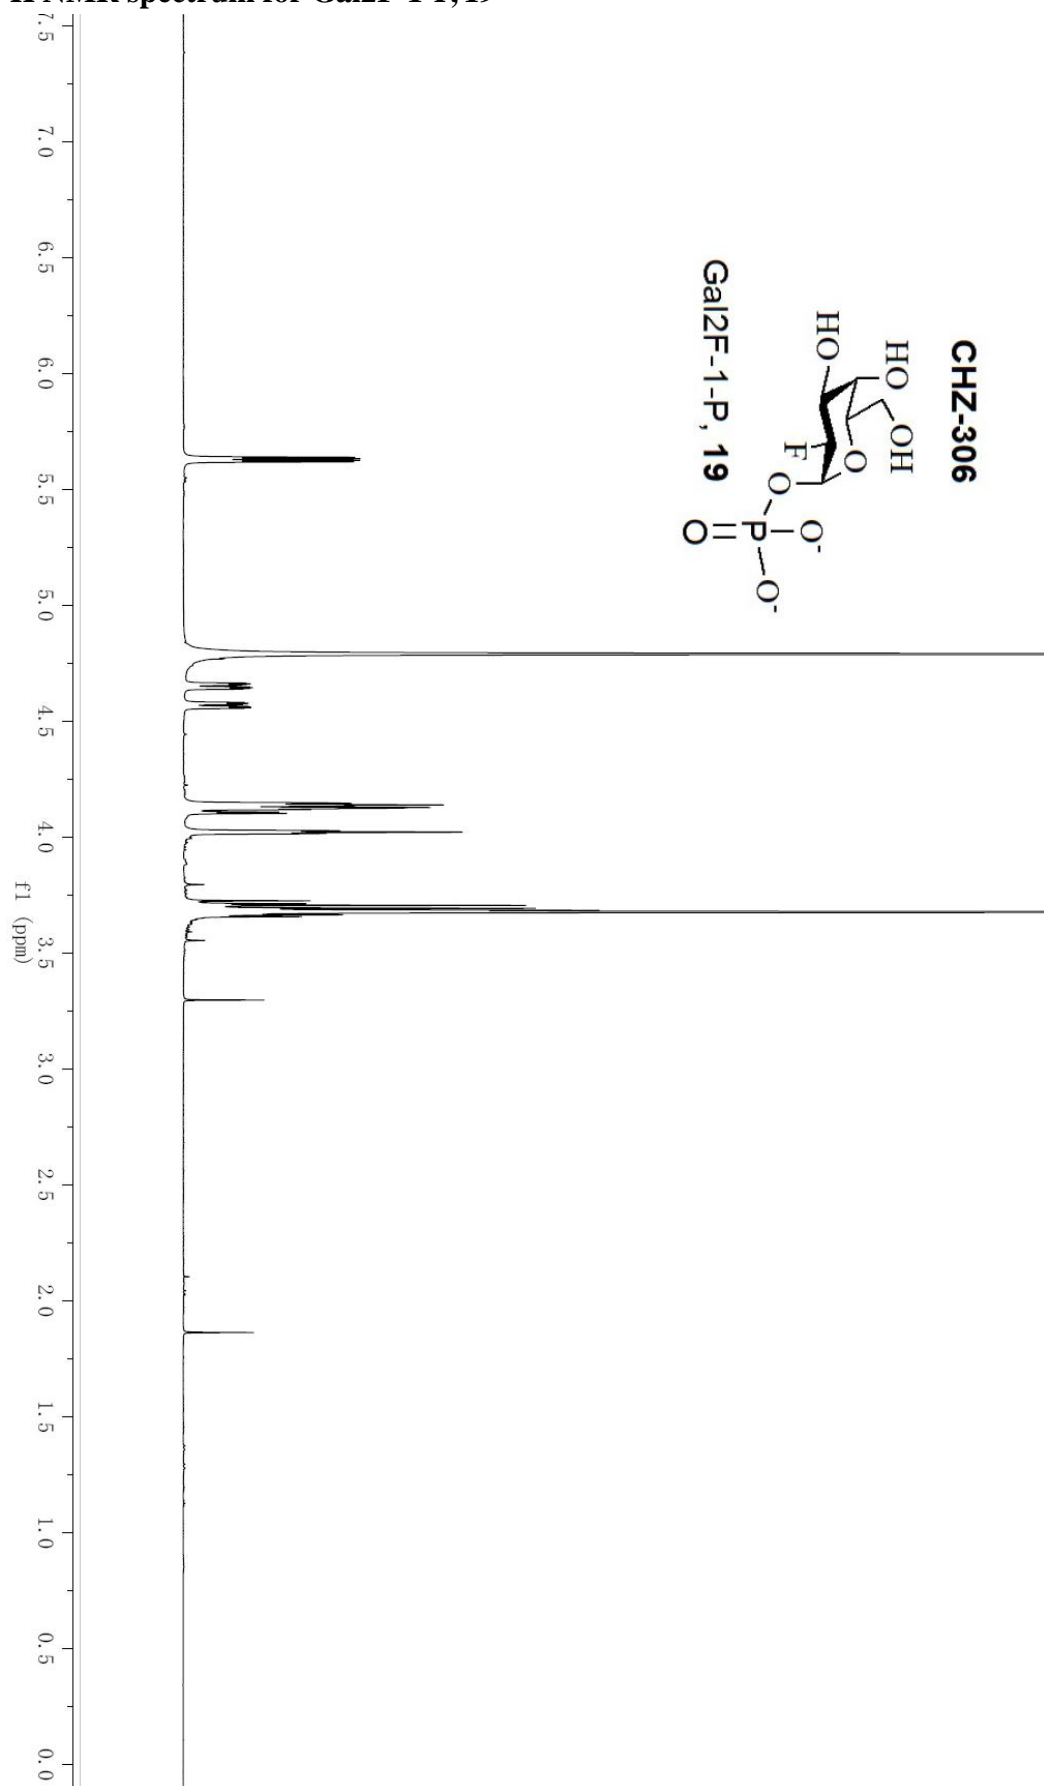

### <sup>13</sup>C NMR spectrum for Gal2F-1-P, 19

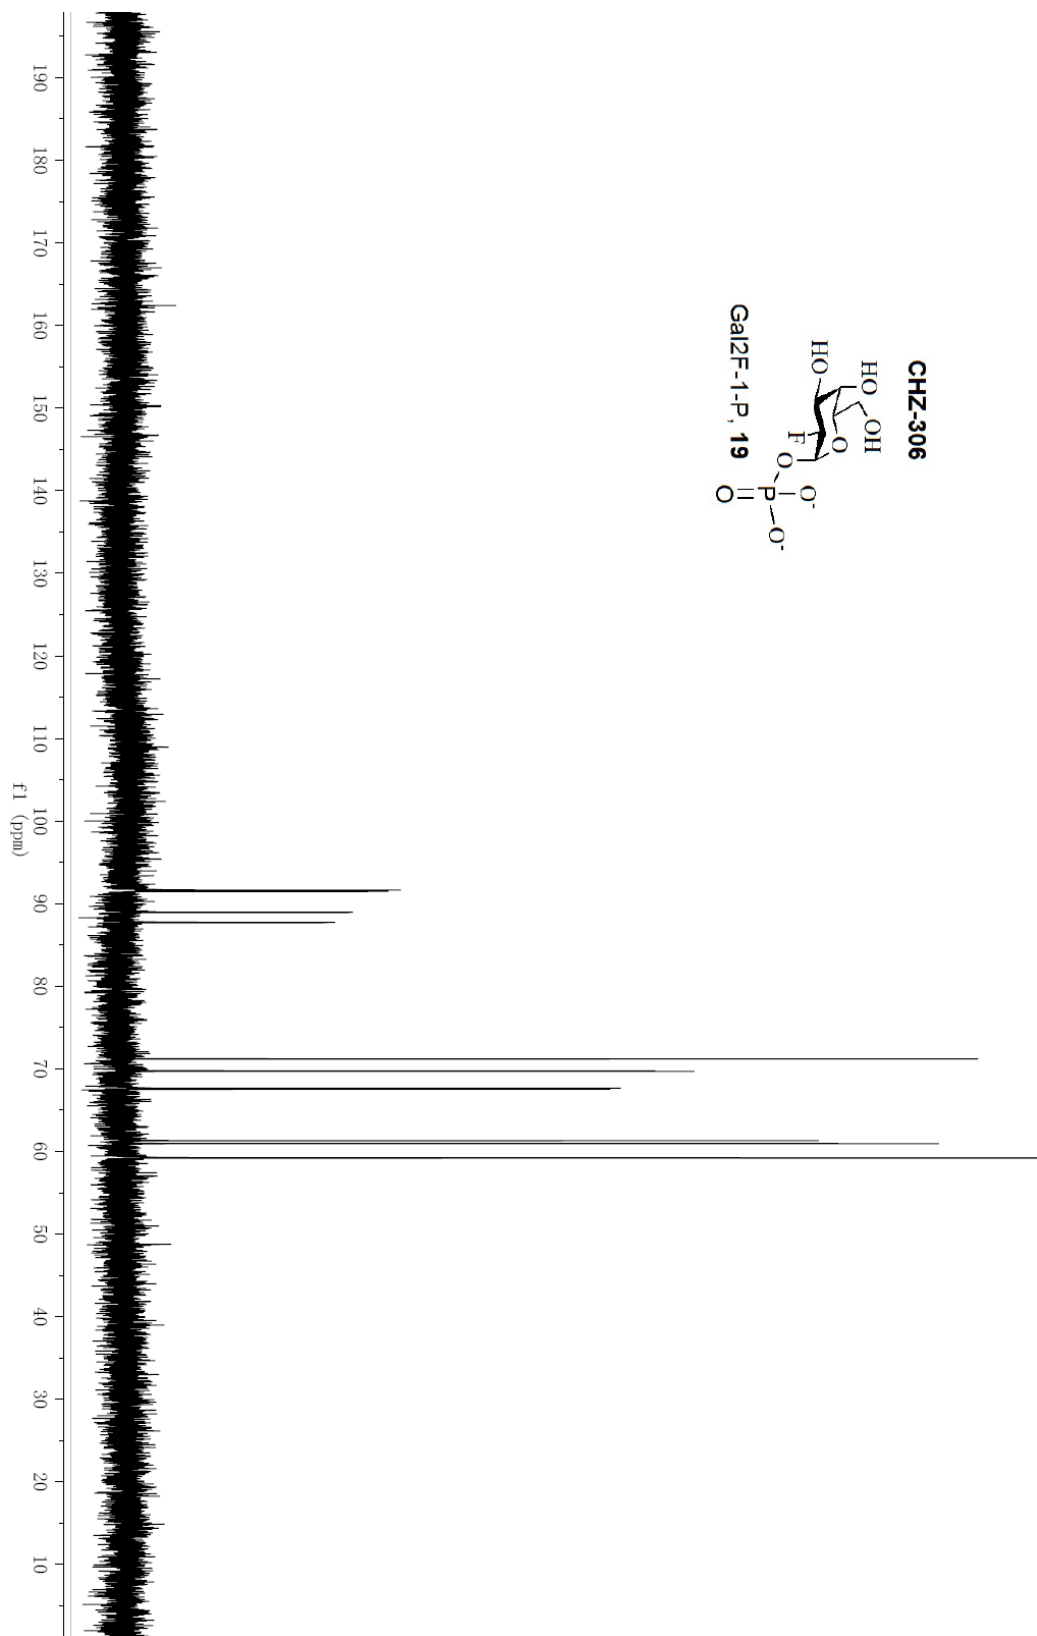

## HPLC conditions and chromatograms of ST-antigens (12–17)

### HPLC Conditions:

HPLC instrument: Waters 2695 Separation Module

Column: GE Healthcare Superdex™ Peptide 10/300 GL

Eluent: 0.1 M NH<sub>4</sub>HCO<sub>3</sub>

Flow rate: 0.5 mL/min

Injection volume: 10 μL

Run time: 50 min

### HPLC chromatograms:

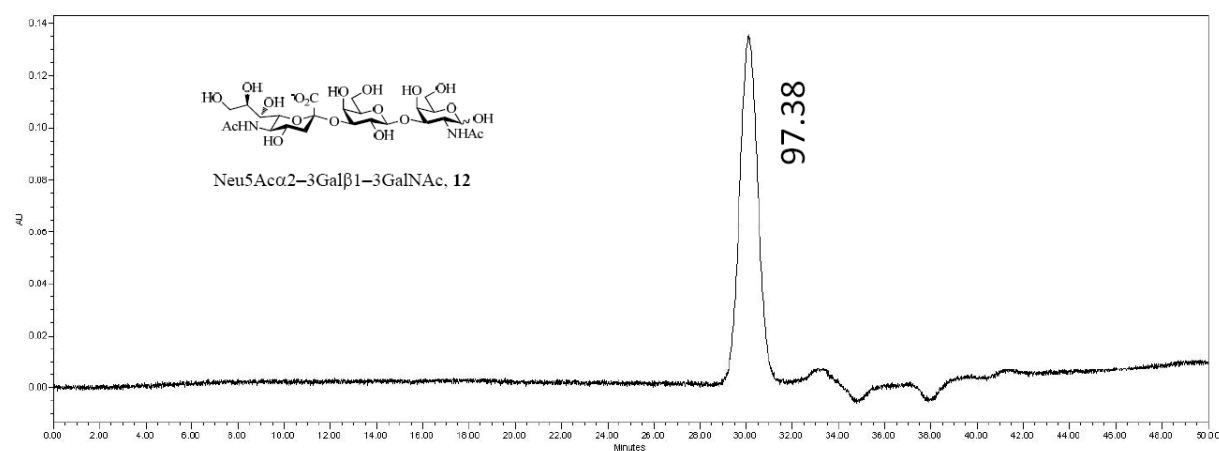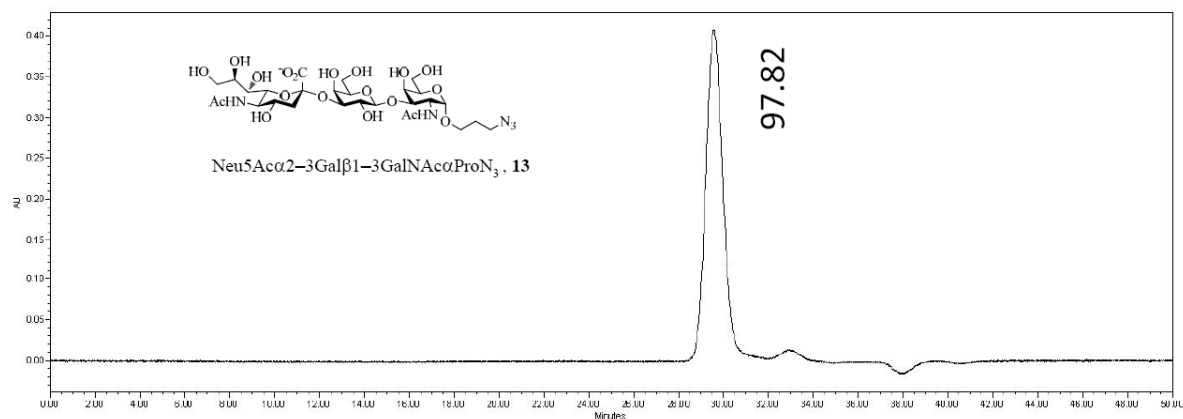

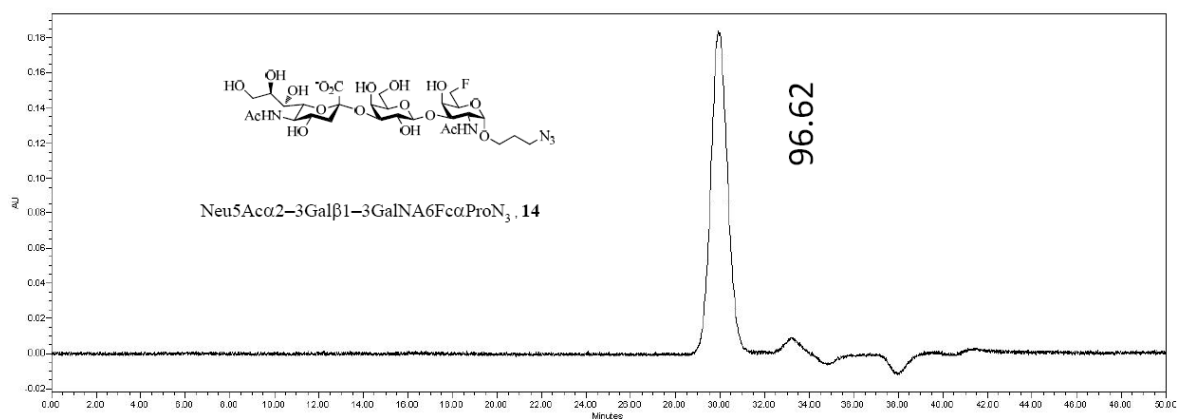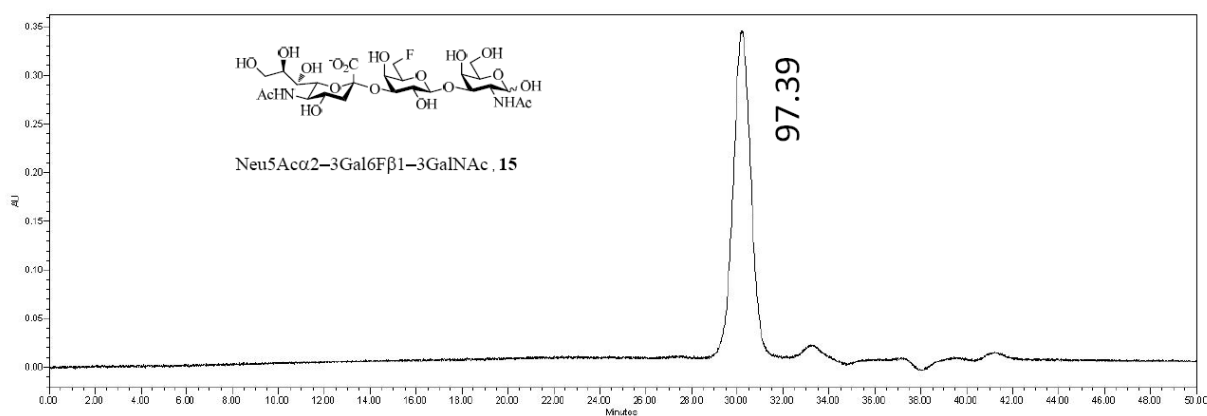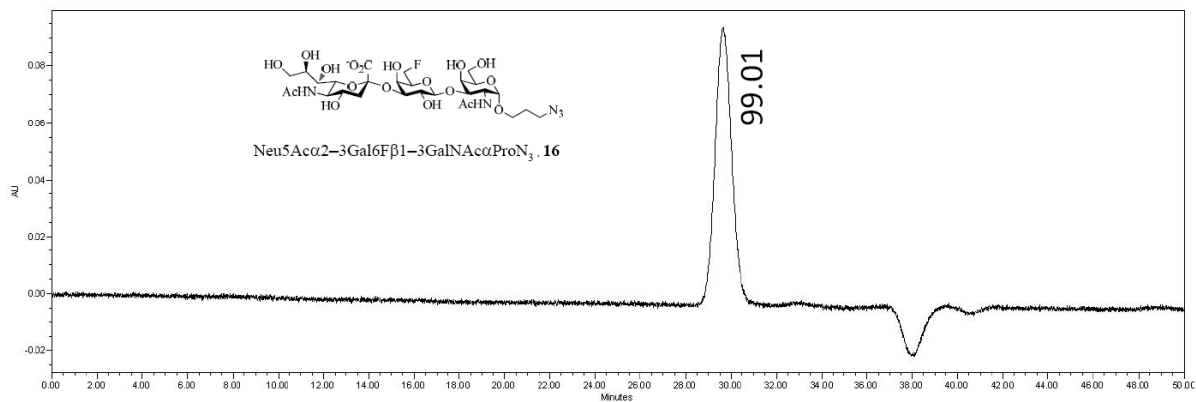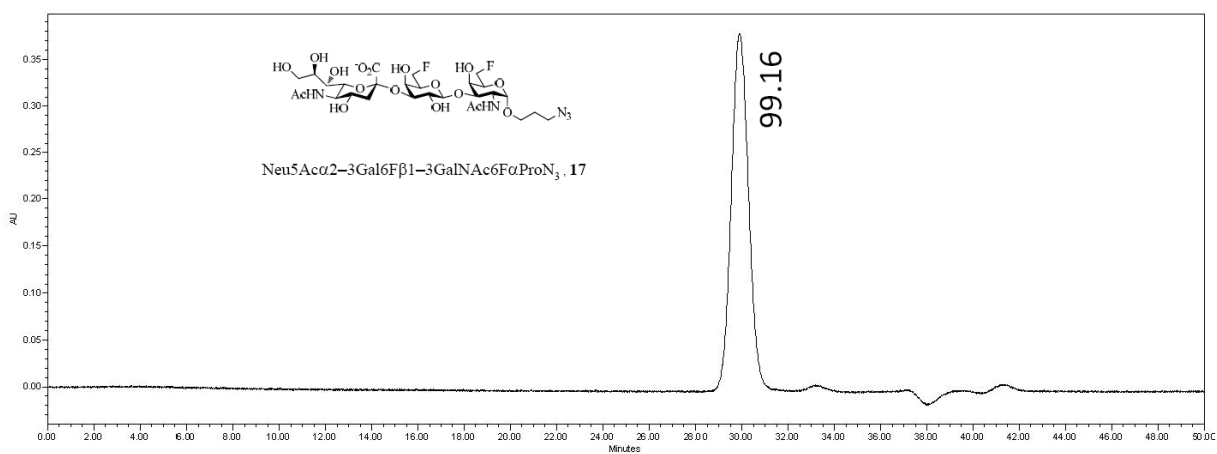

Supplement: c2ob26989a.pdf [file c2ob26989a.pdf]
